# Supplementary material for: VGLL4 plays a critical role in heart valve development and homeostasis
Source: PubMed Central journal article supplement (PMC6400400; doi:10.1371/journal.pgen.1007977), 2019-02-21
Supplement: pgen.1007977.s015.pdf [file pgen.1007977.s015.pdf]

**S4 Table**

Primer used for genotype

| Gene               | Forward                                      | Reverse                                                | Product size        |
|--------------------|----------------------------------------------|--------------------------------------------------------|---------------------|
| <i>Vgll4 LacZ</i>  | TTCCCGCCCGACTGCTGATAACAT                     | GGCTGCTCCCCTCCAACAT<br>ATTGCGTTGCGCCATCTCAGTCAG        | WT:470bp; Mut:413bp |
| <i>Vgll4 flox</i>  | TTCTTCTGGCCTCCATGGGCATTGT                    | ATGTTATCAGCAGTCGGGCGGGAA                               | WT:452bp; Mut:616bp |
| <i>Vgll4 minus</i> | TCCAGCTGAGCGCCGGTCGCTACCA                    | GACCACGTCTCCAAGATGAGCCGCA<br>GCATAATGGCCAGCAGAGGAGACTG | WT:350bp; Mut:470bp |
| <i>Vgll4 eGFP</i>  | GCCTCTGTCTTCCTGAAGTT<br>GCCTAACTCGGTGTCCATC  | TAACAGCGTGTCTCCTCCA<br>TGTTCTGCTGGTAGTGGTC             | WT:405bp; Mut:749bp |
| <i>Rosa RFP</i>    | AAGGGAGCTGCAGTGGAGTA<br>GGCATTAAAGCAGCGTATCC | CCGAAAATCTGTGGGAAGTC<br>CTGTTCTGTACGGCATGG             | WT:297bp; Mut:196bp |

Primer used for quantitative RT-PCR

| Gene             | Forward                   | Reverse                |
|------------------|---------------------------|------------------------|
| <i>Vgll4</i>     | ATGAACAACAATATCGGGCTTCT   | GGGCTCCATGCTGAATTTCC   |
| <i>Yap</i>       | GCCATGCTTTCGCAACTGAA      | CAAAACGAGGGTCCAGCCTT   |
| <i>Ctgf</i>      | TCCGGACACCTAAAATCGCC      | TTCATGATCTCGCCATCGGG   |
| <i>Cyr61</i>     | AGAGGCTTCCTGTCTTTGGC      | CTCGTGTGGAGATGCCAGTT   |
| <i>Survivin</i>  | AGAACAATAATTGCAAAGGAGACCA | GGCATGTCACTCAGGTCCAA   |
| <i>Cyclin A2</i> | GGCTGACACTCTTTCCG         | CTGGTAGCAAGAATTAGAGCAT |
| <i>Cyclin B2</i> | GAGAGTGAAGTCCTGGAA        | GTGCTGATCTTCAGGAGT     |
| <i>Cyclin D1</i> | TGAGAACAAGCAGACCATCC      | TGAACTTCACATCTGTGGCA   |
| <i>Cdk4</i>      | GGGACATCAAGGTCACCCTA      | CGCTTAGAAACTGACGCATT   |
| <i>Ki67</i>      | GCAGGTTAGCACTGTTATGAAAAC  | GGGCCTTGGCTGTTTTACATT  |
| <i>Gapdh</i>     | GAAGGGCTCATGACCACAG       | GATGCAGGGATGATGTTCTG   |
