# Supplementary material for: VGLL4 plays a critical role in heart valve development and homeostasis
Source: PLoS Genet. 2019 Feb 21;15(2):e1007977. doi: 10.1371/journal.pgen.1007977 (PMC6400400; doi:10.1371/journal.pgen.1007977)
Supplement: S1 Data — (ZIP) [file pgen.1007977.s001.zip]

Archive with 14 entries (13 files):
- Supporting information source data/
- Supporting information source data/figS2 data .xlsx
- Supporting information source data/figS3 data.xlsx
- Supporting information source data/figS7 data .xlsx
- Supporting information source data/figure1 data.xlsx
- Supporting information source data/figure3 data .xlsx
- Supporting information source data/figure4 data.xlsx
- Supporting information source data/figure5 data.xlsx
- Supporting information source data/figure6 data.xlsx
- Supporting information source data/figure7 data.xlsx
- Supporting information source data/FigureR1 .xlsx
- Supporting information source data/Table S1 data.xlsx
- Supporting information source data/Table S2 data.xlsx
- Supporting information source data/Table S3 data.xlsx
