# Supplementary material for: VGLL4 plays a critical role in heart valve development and homeostasis
Source: PLoS Genet. 2019 Feb 21;15(2):e1007977. doi: 10.1371/journal.pgen.1007977 (PMC6400400; doi:10.1371/journal.pgen.1007977)
Supplement: S1 Data — (ZIP) [file pgen.1007977.s001.zip › Supporting information source data/figS2 data .xlsx]

## Sheet: 工作表1
Vgll4-/- mice dead information	number
Newborn death pups	15
At day1 death pups	18
At day2 death pups	6
At day3 death pups	2
At day5 death pups	1
At day10 death pups	1
At 2.71 weeks death pups	1
At 8.42 weeks death mice	1
At 11 weeks death mice	1
At 12.42 weeks death mice	1
At 13 weeks death mice	1
At 13.71 weeks death mice	1
WT and Vgll4+/- pups are normal activity until 24 Weeks in our experimental group
