# Supplementary material for: VGLL4 plays a critical role in heart valve development and homeostasis
Source: PLoS Genet. 2019 Feb 21;15(2):e1007977. doi: 10.1371/journal.pgen.1007977 (PMC6400400; doi:10.1371/journal.pgen.1007977)
Supplement: S1 Data — (ZIP) [file pgen.1007977.s001.zip › Supporting information source data/figS3 data.xlsx]

## Sheet: FigS3B
Aortic valve area(μm2)	Vgll4+/+	Vgll4+/-	Vgll4-/-
	16480	16850	32850
	7990	8190	25220
	11330	18000	32180
	12410	21550	17770
	7813.33	8220	17030
	10540	25970	16476.7
	13340	11910	23496.7
	7240	17090	21773.3
	10990	14980	34366.7
	4233.33	14770	14996.7
	5600	10500	17273.3
	9060	8080	14990
	10200	8150	33520
	9020	7976.67	44483.3
	16420	9420	42906.7
	16870	11240	18040
	13470	12930	23600
	20590	12600	21250
		16340	17450
		8180	20810
		14430	30970
		11113.3	26070
		11150	28580
		9910	25770
mean	11310.9	12897.9	25078.1
SEM	1013.96	951.833	1715.21
		0.266136	1.5605e-07
ttest
Vgll4+/+ VS Vgll4+/-	0.266136
Vgll4+/+ VS Vgll4-/-	1.5605e-07

## Sheet: FigS3C
pulmonary valve area(μm2)	Vgll4+/+	Vgll4+/-	Vgll4-/-
	15110	21600	20270
	15440	11070	32560
	8120	15700	30820
	13650	22100	47210
	6313.33	10400	27150
	12030	11490	28060
	12030	11606.7	25560
	12030	17310	25200
	12200	12750	26440
	12086.7	12670	28700
	7610	14270	35040
	6450	18630	22326.7
	6930	17020	21150
	13300	11816.7	32520
	9796.67	17020	22170
	11880	9290	18930
	25150	16806.7	30070
	14090	11630	18590
		9630	37983.3
		10320	24040
			43020
			21330
			34680
			24330
mean	11900.9	14156.5	28256.2
SEM	1040.24	868.25	1519.86
		0.10237	3.33701e-10
ttest
Vgll4+/+ VS Vgll4+/-	0.10237
Vgll4+/+ VS Vgll4-/-	3.33701e-10

## Sheet: FigS3D
Mitral valve area(μm2)	Vgll4+/+	Vgll4+/-	Vgll4-/-
	12000	12430	9700
	16270	10580	13050
	14070	9630	12750
	13210	15760	6810
	11670	11880	6780
	6723.33	13950	8693.33
	18760	12060	7916.67
	7230	13230	15750
		9223.33	10170
		17240	26650
			10780
			16070
mean	12491.7	12598.3	12093.3
SEM	1454.37	808.817	1601.92
		0.946983	0.864454
ttest
Vgll4+/+ VS Vgll4+/-	0.946983
Vgll4+/+ VS Vgll4-/-	0.864454

## Sheet: FigS3E
Tricuspid valve area(μm2)	Vgll4+/+	Vgll4+/-	Vgll4-/-
	14280	9820	10620
	20480	22240	15200
	7953.33	12670	10400
	10560	16990	17860
	11430	6830	9570
	12670	10670	14520
	11210	13020	9690
	14460	23530	30020
		5950	8590
		20500	17490
			17560
			9160
mean	12880.4	14222	14223.3
SEM	1314.79	1991.42	1768.38
		0.602633	0.587092
ttest
Vgll4+/+ VS Vgll4+/-	0.602633
Vgll4+/+ VS Vgll4-/-	0.587092
