# Supplementary material for: VGLL4 plays a critical role in heart valve development and homeostasis
Source: PLoS Genet. 2019 Feb 21;15(2):e1007977. doi: 10.1371/journal.pgen.1007977 (PMC6400400; doi:10.1371/journal.pgen.1007977)
Supplement: S1 Data — (ZIP) [file pgen.1007977.s001.zip › Supporting information source data/figS7 data .xlsx]

## Sheet: FigS7B
Edu positive cells per valve at adult stage
AV
	Vgll4 fl/-		Tie2Cre+:Vgll4 fl/-
	VEC	VIC	VEC	VIC
	0	0	3	4
	1	0	1	6
	0	1	3	4
	0	0	8	3
	0	0	1	4
	1	1	2	6
	0	0	1	7
	0	0	3	4
	1	0	10	8
	0	1	1	4
	1	1	2	6
	0	0	1	4
	0	0	2	3
Mean	0.307692	0.307692	2.92308	4.84615
SEM	0.133235	0.133235	0.788227	0.436274
ttest			5.42953e-10	0.0032274

## Sheet: FigS7C
Edu positive cells per valve at adult stage
PV
	Vgll4 fl/-		Tie2Cre+:Vgll4 fl/-
	VEC	VIC	VEC	VIC
	0	0	3	18
	2	1	6	4
	0	0	1	10
	0	0	1	2
	0	0	3	11
	1	0	5	7
	1	0	2	7
	0	2	1	2
	1	1	1	9
	0	1	2	5
	1	0	3	2
	0	1	1	8
Mean	0.5	0.375	2.75	7.625
SEM	0.267261	0.263052	0.674802	1.89866
ttest			0.00132992	7.7111e-05

## Sheet: S7D-7E
	DAPI	Area by ImageJ	Area(mm2)	DAPI/Area（mm2)
Vgll4fl/-	151	51259	0.0197751	7635.87
	141	46405	0.0179025	7876.01
	167	81496	0.0314401	5311.68
	118	54534	0.0210385	5608.75
	188	69063	0.0266436	7056.09
	188	83152	0.032079	5860.53
	210	103477	0.0399201	5260.5
	241	144675	0.0558138	4317.93
mean	175.5		0.0305766	6115.92
Tie2Cre+;Vgll4 fl/-	282	118662	0.0457783	6160.12
	296	143072	0.0551954	5362.77
	691	340780	0.131469	5256
	603	399967	0.154302	3907.91
	342	109270	0.042155	8112.91
	336	143435	0.0553354	6072.06
mean	425		0.0807059	5811.96
ttest	0.00197637		0.0157841	0.676921
