# Supplementary material for: VGLL4 plays a critical role in heart valve development and homeostasis
Source: PLoS Genet. 2019 Feb 21;15(2):e1007977. doi: 10.1371/journal.pgen.1007977 (PMC6400400; doi:10.1371/journal.pgen.1007977)
Supplement: S1 Data — (ZIP) [file pgen.1007977.s001.zip › Supporting information source data/figure1 data.xlsx]

## Sheet: Fig1D
Body weight(g)	Body weight
age(week)	Vgll4 +/+										Vgll4 +/-												Vgll4-/-									11.4G										13.4g
2	7.6	7.6	8.4	8.7	8.4	7.5	7.6	8.4			7.7	5.7	8.2	7.7	7.7	8	7	7.6	8.7	7.4			3.8	6.7	4.5	5.3	3.2
3	12.7	12.7	12.4	12.1	13.3	12.6	12.6	11.9			12.3	9.9	13.4	13.9	13.5	14.6	12.6	13.1	10.9	12.4			7.6	9.6	4.8	7.4	4.8
4	19.3	19	20.9	18.7	19.8	18	19.2	18			19.3	16.8	19.6	18.6	19.2	20	17.7	18.2	18	18.4			9.2	12	6.4	11.4	6.2
5	21	21.4	22.6	23	24.3	21.4	22.1	22.4			20.1	18.8	22.1	21.2	20.8	21.5	18.7	20.2	22.4	21.3			13.5	15.1	6.9	13.4	7.3
6	22.7	23	24.1	23.8	27	23.4	23.4	24.5			21.5	20.9	23.2	21.9	22.3	22.6	19.8	22.4	24.7	24.8			14.6	16.6	7.5	14.7	9.5
7	23.7	24.1	25.3	24.9	28.9	26.1	26.2	27.7			22.4	22.1	23.8	22.9	23	23.2	21	24	26.4	26			15.6	18	8.5	15.4	13.6
8	24.4	25.8	26	27.7	30.4	26.8	26.5	28.6			23.8	23	24.2	23.9	24.8	24.7	23.7	25.8	28.1	28.2			18.4	17.5	10.3	16.5	15.9
mean
age(week)	Vgll4+/+	Vgll4+/-	Vgll4-/-
2	8.025	7.57	4.7
3	12.5375	12.66	6.84
4	19.1125	18.58	9.04
5	22.275	20.71	11.24
6	23.9875	22.41	12.58
7	25.8625	23.48	14.22
8	27.025	25.02	15.72
ttest	Vgll4+/+ VS Vgll4 -/-		5.21205e-06
ttest
Vgll4+/+ VS Vgll4 -/-		5.21205e-06

## Sheet: Fig1E
HW/BW(%)
	Vgll4+/+	Vgll4+/-	Vgll4-/-
	0.5776	0.5229	0.781
	0.588	0.5758	0.7298
	0.5392	0.4469	0.755
	0.5104	0.5002	0.9661
	0.5434	0.5189	1.4776
	0.5582	0.5971
	0.61039	0.569009
	0.56	0.58731
		0.610787
		0.62711
mean	0.560899	0.555602	0.9419
SEM	0.0110179	0.017881	0.140244
ttest		0.815789	0.0049356
ttest
Vgll4+/+ VS Vgll4 -/-	0.0049356
Vgll4+/+ VS Vgll4 +/-	0.815789

## Sheet: Fig1F
Fold chage compared Vgll4+/+
	Vgll4+/+	Vgll4+/-	Vgll4-/-
	0.776884	0.584701	0.00276361
	0.760896	0.564784	0.00522907
	1.13742	0.434001	0.0810958
	1.3248	0.534318	0.0365438
mean	1	0.529451	0.0314081
SEM	0.138843	0.0334606	0.0182599
ttest		1.23918e-05	0.000451907
ttest
Vgll4+/+ VS Vgll4 -/-	0.000451907
Vgll4+/+ VS Vgll4 +/-	1.23918e-05

## Sheet: Fig1G
Area quantitated by ImageJ	vgll4	tubulin	relative ratio(Vgll4/tubulin)	Average	ttest
Vgll4+/+	25637.2	24965.9	1.02689	1.07845
	30070.8	26611.1	1.13001
Vgll4+/-	17011.5	27324.4	0.622576	0.634247	0.0138693
	14717.5	22785.4	0.645917
Vgll4-/-	1216.51	27079.7	0.0449232	0.0400022	0.00247843
	1026.34	29256	0.0350812
ttest
Vgll4+/+ VS Vgll4 -/-	0.00247843
Vgll4+/+ VS Vgll4 +/-	0.0138693

## Sheet: Fig1I-J
				Vgll4+/+					Vgll4+/-				Vgll4-/-
AoV VTI	PW Doppler Mode	Peak Vel	mm/s	1282.14	1703.9	1515.09	1572.13	1449.87	1202.54	1629.87	1687.26	1171.58	3165.97	1738.95	2395.07	0.0257139	0.0453367	0.586973
AoV VTI	PW Doppler Mode	Peak Grad	mmHg	6.57557	11.6131	9.18198	9.88632	8.40852	5.78444	10.6259	11.3874	5.49037	40.0934	35.8352	22.9454	0.00090633	0.00332091	0.640371
				Vgll4+/+	Vgll4+/-	Vgll4-/-	Vgll4+/+	Vgll4+/-	Vgll4-/-
AoV VTI	PW Doppler Mode	Peak Vel	mm/s	1504.63	1422.81	2433.33	69.5964	136.761	412.389
AoV VTI	PW Doppler Mode	Peak Grad	mmHg	9.13311	8.32201	32.958	0.83025	1.55889	5.155
Peak Vel
ttest
Vgll4+/+ VS Vgll4 -/-	0.0257139
Vgll4+/+ VS Vgll4 +/-	0.586973
Peak Grad
ttest
Vgll4+/+ VS Vgll4 -/-	0.00090633
Vgll4+/+ VS Vgll4 +/-	0.640371

## Sheet: Fig1K-L
		Vgll4-/-	Vgll4-/-	Vgll4-/-	Vgll4-/-	Vgll4-/-	Vgll4+/-	Vgll4+/-	Vgll4+/-	Vgll4+/-	Vgll4+/-	Vgll4+/+	Vgll4+/+	Vgll4+/+	Vgll4+/+	Vgll4+/+				Vgll4-/-	Vgll4+/-	Vgll4+/+	TTEST		Vgll4-/-	Vgll4+/-	Vgll4+/+
Ejection Fraction	%	65.3743	71.4721	78.047	71.5514	64.4977	69.0861	67.6503	60.7869	53.5494	73.7995	61.068	62.142	65.4957	64.657	64.4344		Ejection Fraction	%	70.1885	64.9744	63.5594	0.0339721	0.70707	2.45787	3.53565	0.834741
Fractional Shortening	%	34.3674	39.779	40.1781	39.8284	34.4326	37.7776	36.9608	32.1563	27.2476	41.8683	32.1792	33.1696	35.7355	34.8475	34.8373		Fractional Shortening	%	37.7171	35.2021	34.1538	0.0450287	0.697191	1.35598	2.51709	0.644899
EF
ttest
Vgll4+/+ VS Vgll4 -/-	0.0339721
Vgll4+/+ VS Vgll4 +/-	0.70707
FS
ttest
Vgll4+/+ VS Vgll4 -/-	0.0450287
Vgll4+/+ VS Vgll4 +/-	0.697191

## Sheet: Fig 1O
Aortic valve area(μm2)	Vgll4+/+	Vgll4+/-	Vgll4-/-
	21832.4	24354.2	105274
	24541.8	30835.4	181454
	33173.7	30196.1	155970
	32527.5	45289.6	151199
			110811
			81131.4
			311210
			275730
			187450
			319400
			294763
			274760
mean	28018.9	32668.8	204096
SEM	2846.96	4452.47	25016
ttest		0.412779	0.00140145
ttest
Vgll4+/+ VS Vgll4 -/-	0.00140145
Vgll4+/+ VS Vgll4 +/-	0.412779

## Sheet: Fig1P
Pulmonary valve area(μm2)	Vgll4+/+	Vgll4+/-	Vgll4-/-
	12146.7	16553.3	314623
	22360	13320	345140
	17132.3	24750	156433
	15231.2	31653.3	217617
	20152.9	23343.3	204187
		37210	109320
		30510
		47486.7
		59863.3
mean	17404.6	31632.2	224553
SEM	1796.56	4943.45	36984.6
ttest		0.0608035	0.000678946
ttest
Vgll4+/+ VS Vgll4 -/-	0.000678946
Vgll4+/+ VS Vgll4 +/-	0.0608035
