# Supplementary material for: VGLL4 plays a critical role in heart valve development and homeostasis
Source: PLoS Genet. 2019 Feb 21;15(2):e1007977. doi: 10.1371/journal.pgen.1007977 (PMC6400400; doi:10.1371/journal.pgen.1007977)
Supplement: S1 Data — (ZIP) [file pgen.1007977.s001.zip › Supporting information source data/figure3 data .xlsx]

## Sheet: Fig3B
P0 Aortic valve area(μm2)	Vgll4 fl/-	WntCre+;Vgll4 fl/-	Tie2Cre+;Vgll4 fl/-
	16850	16440	16490
	8190	19410	16960
	18000	15920	27720
	21550	7620	32350
	8220	11417.3	20690
	25970	8706.67	43146.7
	11910	19058.7	29810
	17090	15874.7	30130
	14980		16490
	14770		16960
	10500		24205
	8080		32350
	8150		43146.7
	7976.67		29810
	9420		30130
	11240
	12930
	16420
	16870
	13470
	13210
	10850
	16970
	19650
mean	13886.1	14305.9	27359.2
SEM	970.518	1596.08	2270.72
ttest		0.828282	3.16849e-07
ttest
Vgll4 fl/- VS WntCre+;Vgll4 fl/-	0.828282
Vgll4 fl/- VS Tie2Cre+;Vgll4 fl/-	3.16849e-07

## Sheet: Fig3D
P0 Pulmonary valve area(μm2)		Vgll4 fl/-	WntCre+;Vgll4 fl/-	Tie2Cre+;Vgll4 fl/-
		21600	27040	14530
		11070	30156.7	24680
		15700	15100	17920
		22100	17576.7	14980
		10400	11060	16070
		11490	10240	12810
		11606.7	8150	14530
		17310	9030	24680
		12750	14270	17920
		12670	18170	14980
		14270		24780
		18630		26340
		11250		24550
		13370		28040
		21910		20910
		18120		22380
mean		15265.4	16079.3	20006.2
SEM		1035.84	2359.41	1266.1
ttest			0.722624	0.00695254
ttest
Vgll4 fl/- VS WntCre+;Vgll4 fl/-	0.722624
Vgll4 fl/- VS Tie2Cre+;Vgll4 fl/-	0.00695254

## Sheet: Fig3F
Adult Aortic valve area(μm2)		Vgll4 fl/-	WntCre+;Vgll4 fl/-	Tie2Cre+;Vgll4 fl/-
		43433.3	56646.7	83813.3
		65660	47390	118253
		75130	49203.3	87713.3
		58590	47040	62526.7
		58590	40720	127173
		42613.3	57240	160380
		34266.7	145433	390110
		37033.3	31406.7	349260
		84380	63216.7
		44290	69363.3
		27696.7
		96206.7
		94376.7
		53173.3
		32810
		27916.7
mean		54760.4	60766	172404
SEM		5695.29	10023.7	44499.3
ttest			0.578903	0.00125275
ttest
Vgll4 fl/- VS WntCre+;Vgll4 fl/-	0.578903
Vgll4 fl/- VS Tie2Cre+;Vgll4 fl/-	0.00125275

## Sheet: Fig3H
Adult Pulmonary valve area(μm2)		Vgll4 fl/-	WntCre+;Vgll4 fl/-	Tie2Cre+;Vgll4 fl/-
		16553.3	39320	46630
		13320	28313.3	30550
		33920	30783.3	36841
		36633.3	46760	18231.7
		34826.7	26280	31523.3
		24750	39903.3	64290
		31653.3	37750	110013
		23343.3	52546.7	127963
		37210	39260	39506.7
		30510	32756.7	63880
		47486.7		60196.7
		59863.3		70130
mean		32505.8	37367.3	58313
SEM		3683.3	2586.54	9446.9
ttest			0.311654	0.0184468
ttest
Vgll4 fl/- VS WntCre+;Vgll4 fl/-	0.311654
Vgll4 fl/- VS Tie2Cre+;Vgll4 fl/-	0.0184468
