# Supplementary material for: VGLL4 plays a critical role in heart valve development and homeostasis
Source: PLoS Genet. 2019 Feb 21;15(2):e1007977. doi: 10.1371/journal.pgen.1007977 (PMC6400400; doi:10.1371/journal.pgen.1007977)
Supplement: S1 Data — (ZIP) [file pgen.1007977.s001.zip › Supporting information source data/figure4 data.xlsx]

## Sheet: figure4B-4D
		Vgll4fl/-						Tie2Cre+;Vgll4 fl/-				ttest		Vgll4fl/-	Tie2Cre+;Vgll4 fl/-	Vgll4fl/-	Tie2Cre+;Vgll4 fl/-
EF	%	74.257	54.9192	67.8321	61.4459	51.3298	72.9498	51.9629	51.7956	45.8107	46.4231	0.0184244		63.7889	48.9981	3.86971	1.66849
FS	%	42.2078	27.8481	37.037	32.5967	25.8427	41.3174	26.1628	25.9259	22.6316	23.3766	0.023653		34.475	24.5242	2.79964	0.892036
LV Mass	mg	135.884	257.571	121.766	214.683	180.788	171.513	259.499	214.71	420.475	274.373	0.0332702		180.367	292.264	20.5178	44.5779
LV Mass (Corrected)	mg	108.707	206.057	97.4125	171.746	144.63	137.21	207.599	171.768	336.38	219.498	0.0332702		144.294	233.811	16.4143	35.6624

## Sheet: Fig4E
	HW/WB	Vgll4 fl/- (mg/g)	Tie2Cre+;Vgll4 fl/-(mg/g)
		5.89177	9.00305
		6.55839	8.10356
		6.56061	10.1634
		3.82108	9.45504
		4.66071
		8.04082
		5.89177
		6.75749
		7.19126
		5.67836
	Mean	6.10523	9.18126
	ttest		0.000650207

## Sheet: Fig4H
	Area quantitated by ImageJ		Tie2Cre+;Vgll4fl/-				Vgll4fl/-
			Fibrosis area	Total area	relative fibrosis area		Fibrosis area	Total area	relative fibrosis area
			7015	183290	0.0382727		5468	317403	0.0172273
			5147	186293	0.0276285		4073	382488	0.0106487
			4285	121162	0.0353659		12312	636720	0.0193366
			9615	523625	0.0183624		8172	354554	0.0230487
			4323	248265	0.0174128		6478	432235	0.0149872
			2978	227361	0.0130981		6527	573421	0.0113826
			9283	464090	0.0200026		4237	412873	0.0102622
			15123	217364	0.0695745		5468	317403	0.0172273
			6152	172635	0.0356359		6237	423527	0.0147263
			3221	132452	0.0243182		9261	507263	0.0182568
			8654	139283	0.0621325		7293	229287	0.0318073
		mean			0.0328913				0.0171737
		sem			0.0055211				0.00188092
								ttest	0.0139378
	narmalize		Tie2Cre+;Vgll4fl/-	Vgll4fl/-
		mean	1.91521	1
		sem	0.321485	0.109523

## Sheet: Fig4J
Area quantitated by ImageJ		Vgll4fl/- ( CM area)	Tie2Cre+;Vgll4 fl/- ( CM area)
		657.709	399.296
		628.494	409.002
		928.134	277.921
		1056.14	453.4
		688.749	459.646
		719.02	340.29
		613.214	364.027
		608.986	414.96
		770.53	331.545
		714.312	403.908
		575.063	399.296
		556.707	321.358
		479.827	344.903
		335.005	369.024
		522.304	302.811
		659.246	296.372
		619.172	372.868
		689.325	430.144
		541.908	419.861
		1054.22	331.449
	Mean	670.903	372.104
	SEM	39.6869	11.7784
Normalize	Mean	1.803	1
	SEM	0.106655	0.0316536
	ttest		1.25036e-08
