# Supplementary material for: VGLL4 plays a critical role in heart valve development and homeostasis
Source: PLoS Genet. 2019 Feb 21;15(2):e1007977. doi: 10.1371/journal.pgen.1007977 (PMC6400400; doi:10.1371/journal.pgen.1007977)
Supplement: S1 Data — (ZIP) [file pgen.1007977.s001.zip › Supporting information source data/figure5 data.xlsx]

## Sheet: Fig5C 5E
Tie2 RFP WT
AV											PV
	Valve area by ImageJ	DAPI	RFP+ EdU	RFP- EdU	total edu	DAPI/area	RFP+ edu%	RFP-edu%	RFP+edu/edu	0.000259165		area	DAPI	RFP+ EdU	RFP- EdU	total edu	DAPI/area	RFP+ edu%	RFP-edu%	RFP+edu/edu	2.97691e-05
1	19908	231	2	6	8	0.0116034	0.865801	2.5974	25		1	23692.6	279	2	6	8	0.0117758	0.716846	2.15054	25
2	29344.1	322	4	4	8	0.0109733	1.24224	1.24224	50		2	14054.1	171	1	2	3	0.0121673	0.584795	1.16959	33.3333
3	20623.2	243	4	3	7	0.0117829	1.64609	1.23457	57.1429		3	21889	276	3	2	5	0.0126091	1.08696	0.724638	60
4	17537.5	192	2	3	5	0.010948	1.04167	1.5625	40		4	22030.6	241	3	5	8	0.0109393	1.24481	2.07469	37.5
5	19273.3	246	2	4	6	0.0127638	0.813008	1.62602	33.3333		5	19236.3	261	1	4	5	0.0135681	0.383142	1.53257	20
Wnt RFP WT
AV											PV
	Valve area by ImageJ	DAPI	RFP+ EdU	RFP- EdU	total edu	DAPI/area	RFP+ edu%	RFP-edu%	RFP+edu/edu	0.545903		area	DAPI	RFP+ EdU	RFP- EdU	total edu	DAPI/area	RFP+ edu%	RFP-edu%	RFP+edu/edu	0.787877
1	21182.5	243	4	3	7	0.0114717	1.64609	1.23457	57.1429		1	19018.7	244	1	3	4	0.0128672	0.409836	1.22951	25
2	20596.7	232	2	6	8	0.0113627	0.862069	2.58621	25		2	27446.6	322	3	5	8	0.0117263	0.931677	1.5528	37.5
3	20546.4	223	3	5	8	0.0116253	1.34529	2.24215	37.5		3	23617.3	268	4	3	7	0.0113476	1.49254	1.1194	57.1429
4	24371.2	276	2	5	7	0.0113249	0.724638	1.81159	28.5714		4	22837.3	261	2	5	7	0.0114287	0.766284	1.91571	28.5714
5	23617.3	281	4	4	8	0.0118981	1.42349	1.42349	50		5	25713.3	311	4	5	9	0.0120949	1.28617	1.60772	44.4444
Tie2 RFP Mut
AV											PV
	Valve area by ImageJ	DAPI	RFP+ EdU	RFP- EdU	total edu	DAPI/area	RFP+ edu%	RFP-edu%	RFP+edu/edu			area	DAPI	RFP+ EdU	RFP- EdU	total edu	DAPI/area	RFP+ edu%	RFP-edu%	RFP+edu/edu
1	87947.8	1134	27	13	40	0.012894	2.38095	1.14638	67.5		1	32865.5	412	13	9	22	0.0125359	3.15534	2.18447	59.0909
2	42605.7	488	15	11	26	0.0114539	3.07377	2.2541	57.6923		2	41293.7	451	18	4	22	0.0109218	3.99113	0.886918	81.8182
3	72836.6	925	22	9	31	0.0126997	2.37838	0.972973	70.9677		3	38625.2	441	12	6	18	0.0114174	2.72109	1.36054	66.6667
4	52763.3	576	21	10	31	0.0109167	3.64583	1.73611	67.7419		4	34728.3	388	11	2	13	0.0111725	2.83505	0.515464	84.6154
5	57283.3	632	18	9	27	0.0110329	2.8481	1.42405	66.6667		5	39281.3	471	14	7	21	0.0119905	2.9724	1.4862	66.6667
Wnt RFP Mut
AV											PV
	Valve area by ImageJ	DAPI	RFP+ EdU	RFP- EdU	total edu	DAPI/area	RFP+ edu%	RFP-edu%	RFP+edu/edu			area	DAPI	RFP+ EdU	RFP- EdU	total edu	DAPI/area	RFP+ edu%	RFP-edu%	RFP+edu/edu
1	19612.3	219	3	5	8	0.0111665	1.36986	2.28311	37.5		1	21135	245	1	6	7	0.0115921	0.408163	2.44898	14.2857
2	22736.4	241	3	4	7	0.0105998	1.24481	1.65975	42.8571		2	22682	268	2	5	7	0.0118155	0.746269	1.86567	28.5714
3	21764.7	261	2	6	8	0.0119919	0.766284	2.29885	25		3	24152.2	291	4	4	8	0.0120486	1.37457	1.37457	50
4	24718.8	285	4	5	9	0.0115297	1.40351	1.75439	44.4444		4	19273.3	222	2	3	5	0.0115185	0.900901	1.35135	40
5	23817.4	261	1	3	4	0.0109584	0.383142	1.14943	25		5	23716.8	271	3	4	7	0.0114265	1.10701	1.47601	42.8571
