# Supplementary material for: VGLL4 plays a critical role in heart valve development and homeostasis
Source: PLoS Genet. 2019 Feb 21;15(2):e1007977. doi: 10.1371/journal.pgen.1007977 (PMC6400400; doi:10.1371/journal.pgen.1007977)
Supplement: S1 Data — (ZIP) [file pgen.1007977.s001.zip › Supporting information source data/figure6 data.xlsx]

## Sheet: Fig6B
HW/BW(mg/g)	Vgll4 fl/-;Yap fl/+	Tie2Cre+;Vgll4 fl/-	Tie2Cre+;Vgll4 fl/-;Yap fl/+
	5.2	6.6	6.5
	6.2	7.9	6.1
	4.5	7.2	6.4
	5	8	5.6
Mean	5.225	7.425	6.15
SEM	0.35678	0.327554	0.202073
ttest		0.00392375	0.0765853
			0.0161482
ttest
Vgll4 fl/-;Yap fl/+VSTie2Cre+;Vgll4 fl/-	0.00392375
Vgll4 fl/-;Yap fl/+VSTie2Cre+;Vgll4 fl/-;Yap fl/+	0.0765853
Tie2Cre+;Vgll4 fl/-;VSTie2Cre+;Vgll4 fl/-;Yap fl/+	0.0161482

## Sheet: Fig6C-6D
		Vgll4 fl/-;Yap fl/+							Tie2Cre+;Vgll4 fl/-						Tie2Cre+;Vgll4 fl/-;Yap fl/+
Ejection Fraction	%	78.7016	60.5922	63.4318	66.1127	74.0277	61.458	63.9592	50.6897	57.4575	42.5971	61.0957	60.9427	58.4519	61.3053	68.441	76.1393	78.1339	59.9734	0.0174818	Ejection Fraction	%
Fractional Shortening	%	46.0428	31.4654	34.0572	35.8965	42.4075	32.8898	33.8076	25.4969	29.7274	20.9013	32.0432	32.0176	30.4456	31.9962	37.3501	43.5856	46.1914	31.3546	0.0181573	Fractional Shortening	%
		78.7016	60.5922	63.4318	66.1127	74.0277	61.458	63.9592	50.6897	57.4575	42.5971	61.0957	60.9427	58.4519	61.3053	68.441	76.1393	78.1339	59.9734
		46.0428	31.4654	34.0572	35.8965	42.4075	32.8898	33.8076	25.4969	29.7274	20.9013	32.0432	32.0176	30.4456	31.9962	37.3501	43.5856	46.1914	31.3546
		Mean				SEM				ttest
		Vgll4 fl/-;Yap fl/+	Tie2Cre+;Vgll4 fl/-	Tie2Cre+;Vgll4 fl/-;Yap fl/+		Vgll4 fl/-;Yap fl/+	Tie2Cre+;Vgll4 fl/-	Tie2Cre+;Vgll4 fl/-;Yap fl/+		0.0122956	0.672514	0.0218049
EF	%	66.8976	55.2058	68.7986		2.58559	2.95852	3.70942		0.0131097	0.688522	0.0198072
FS	%	36.6524	28.4387	38.0956		2.05729	1.79775	2.99066
EF ttest
Vgll4 fl/-;Yap fl/+VSTie2Cre+;Vgll4 fl/-	0.0122956
Vgll4 fl/-;Yap fl/+VSTie2Cre+;Vgll4 fl/-;Yap fl/+	0.672514
Tie2Cre+;Vgll4 fl/-;VSTie2Cre+;Vgll4 fl/-;Yap fl/+	0.0218049
FS ttest
Vgll4 fl/-;Yap fl/+VSTie2Cre+;Vgll4 fl/-	0.0131097
Vgll4 fl/-;Yap fl/+VSTie2Cre+;Vgll4 fl/-;Yap fl/+	0.688522
Tie2Cre+;Vgll4 fl/-;VSTie2Cre+;Vgll4 fl/-;Yap fl/+	0.0198072

## Sheet: Fig6F
Adult Aortic valve area(μm2)	Vgll4 fl/-;Yap fl/+	Tie2Cre+;Vgll4 fl/-	Tie2Cre+;Vgll4 fl/-;Yap fl/+
	35526.7	251630	47770
	22986.7	231927	63166.7
	65130	110910	43940
	47950	112090	34586.7
	51580	193723	31060
	57260	286410	68250
	94376.7	158853	147340
	53173.3	177063	71690
	32810	129327	57883.3
	27916.7	201393	55500
Mean	48871	185333	62118.7
SEM	6647.72	18832.8	10388.9
ttest		2.14371e-06	0.296969
ttest			1.97372e-05
Vgll4 fl/-;Yap fl/+VSTie2Cre+;Vgll4 fl/-	2.14371e-06
Vgll4 fl/-;Yap fl/+VSTie2Cre+;Vgll4 fl/-;Yap fl/+	0.296969
Tie2Cre+;Vgll4 fl/-;VSTie2Cre+;Vgll4 fl/-;Yap fl/+	1.97372e-05

## Sheet: Fig6H
Adult Pulmonary valve area(μm2)	Vgll4 fl/-;Yap fl/+	Tie2Cre+;Vgll4 fl/-	Tie2Cre+;Vgll4 fl/-;Yap fl/+
	12146.7	110013	32643.3
	22360	127963	58250
	42173.3	81346.7	24466.7
	21420	89956.7	21430
	43340	116040	15040
	26956.7	189573	21630
	45490	124230	63780
	47960	131280	54736.7
	32850	173560	60363.3
	42803.3	167690	59083.3
Mean	33750	131165	41142.3
SEM	3915.86	11283	6220.23
ttest		1.8575e-07	0.327873
			1.59204e-06
ttest
Vgll4 fl/-;Yap fl/+VSTie2Cre+;Vgll4 fl/-	1.8575e-07
Vgll4 fl/-;Yap fl/+VSTie2Cre+;Vgll4 fl/-;Yap fl/+	0.327873
Tie2Cre+;Vgll4 fl/-;VSTie2Cre+;Vgll4 fl/-;Yap fl/+	1.59204e-06

## Sheet: Fig6I
6I	A			B			C					A	B	C
fold change compared with ctrl(Normalized GAPDH)	Vgll4 fl/fl;Yap fl/+			Tie2Cre+;Vgll4 fl/fl			TieCre+;Vgll4 fl/fl;Yap fl/+					Vgll4 fl/fl;Yap fl/+	Tie2Cre+;Vgll4 fl/fl	TieCre+;Vgll4 fl/fl;Yap fl/+
	1	2	3	1	2	3	1	2	3	Mean					Ttest	B VS A	C VS A	B VS C
Vgll4	0.962349	0.91677	1.12088	0.417438	0.359642	0.305582	0.208719	0.314173	0.309848		Vgll4	1	0.360887	0.27758		0.000788861	0.000519881	0.152484
Yap	0.725881	1.07014	1.20397	0.813833	0.925179	1.12335	0.553941	0.50973	0.557794		Yap	1	0.95412	0.540489		0.79915	0.0326465	0.0107817
Ctgf	0.932142	0.887994	1.17986	1.50903	1.1318	0.906652	0.569837	0.636672	0.594036		Ctgf	1	1.18249	0.600181		0.408452	0.0126119	0.0301189
Cyr61	1.08673	0.920183	0.993088	1.34723	1.70526	1.38031	1.07922	1.20163	0.888838		Cyr61	1	1.4776	1.05656		0.0182699	0.612046	0.0448846
Survivn	0.997207	0.963239	1.03955	1.6771	1.90655	1.2666	0.793315	0.821291	1.07995		Survivn	1	1.61675	0.898185		0.0307255	0.339098	0.026038

## Sheet: Fig6J
6J	A			B			C					A	B	C
fold change compared with ctrl(Normalized GAPDH)	Vgll4 fl/fl;Yap fl/+			Tie2Cre+;Vgll4 fl/fl			TieCre+;Vgll4 fl/fl;Yap fl/+					Vgll4 fl/fl;Yap fl/+	Tie2Cre+;Vgll4 fl/fl	TieCre+;Vgll4 fl/fl;Yap fl/+
	1	2	3	1	2	3	1	2	3	Mean					Ttest	B VS A	C VS A	B VS C
Vgll4	1.019	0.944192	1.03681	0.766922	0.473735	0.44201	0.432914	0.551775	0.542296		Vgll4	1	0.560889	0.508995		0.0149201	0.00049571	0.662324
Yap	0.971342	0.857406	1.17125	1.05926	1.35948	0.995195	0.581581	0.527796	0.515145		Yap	1	1.13798	0.541507		0.395167	0.00816242	0.00639735
Ctgf	0.936138	1.00333	1.06054	1.15652	1.10175	1.19731	0.916872	0.70946	0.916872		Ctgf	1	1.15186	0.847735		0.0286524	0.122395	0.0150538
Cyr61	1.14547	1.09881	0.755727	1.59211	1.53787	1.39565	0.796053	0.660182	0.779671		Cyr61	1	1.50854	0.745302		0.020194	0.121927	0.000461937
Survivn	0.872906	0.975287	1.15181	2.1345	1.70397	1.60648	0.866877	1.24738	1.46297		Survivn	1	1.81498	1.19241		0.0109081	0.373785	0.0591088

## Sheet: Fig6K
6K	A			B			C					A	B	C
fold change compared with ctrl(Normalized GAPDH)	Vgll4 fl/fl;Yap fl/+			Tie2Cre+;Vgll4 fl/fl			TieCre+;Vgll4 fl/fl;Yap fl/+					Vgll4 fl/fl;Yap fl/+	Tie2Cre+;Vgll4 fl/fl	TieCre+;Vgll4 fl/fl;Yap fl/+
	1	2	3	1	2	3	1	2	3	Mean					Ttest	B VS A	C VS A	B VS C
CyclinA2	0.973323	0.946707	1.07997	1.79128	1.98067	1.46002	0.963256	0.889453	1.33421		CyclinA2	1	1.74399	1.06231		0.00914637	0.686557	0.0292997
CyclinB2	0.733229	1.33546	0.931312	2.24597	2.02418	1.84336	1.21195	1.10369	1.76827		CyclinB2	1	2.03783	1.3613		0.00807461	0.254251	0.0459064
CyclinD1	0.803208	0.909941	1.28685	2.13442	2.12704	1.75181	1.60642	1.57336	0.79215		CyclinD1	1	2.00442	1.32397		0.00656861	0.34639	0.0820189
CDK4	1.01799	1.0322	0.949815	1.43467	1.51647	1.21902	0.993588	0.953113	0.6074		CDK4	1	1.39005	0.851367		0.0134086	0.300684	0.0235708
Ki67	1.17205	1.02742	0.800531	1.84552	2.18712	1.6178	0.675501	1.07105	1.53053		Ki67	1	1.88348	1.09236		0.011073	0.749226	0.0563483

## Sheet: 6L
6L	A			B			C					A	B	C
fold change compared with ctrl(Normalized GAPDH)	Vgll4 fl/fl;Yap fl/+			Tie2Cre+;Vgll4 fl/fl			TieCre+;Vgll4 fl/fl;Yap fl/+					Vgll4 fl/fl;Yap fl/+	Tie2Cre+;Vgll4 fl/fl	TieCre+;Vgll4 fl/fl;Yap fl/+
	1	2	3	1	2	3	1	2	3	Mean					Ttest	B VS A	C VS A	B VS C
CyclinA2	1.29794	1.01131	0.690746	1.60907	1.73055	2.25203	1.53818	1.34838	1.32063		CyclinA2	1	1.86388	1.4024		0.0306923	0.09933	0.0915327
CyclinB2	0.891521	0.685079	1.4234	1.67521	1.73429	1.78304	1.12065	1.87169	1.40868		CyclinB2	1	1.73085	1.46701		0.0302094	0.206651	0.298441
CyclinD1	0.736422	1.13179	1.13179	1.34127	2.05424	1.93001	1.56223	1.51425	0.834281		CyclinD1	1	1.77517	1.30359		0.0390194	0.322945	0.216759
CDK4	0.967525	1.05144	0.981031	1.19945	1.24175	1.47669	1.0999	0.63612	0.631726		CDK4	1	1.30596	0.789248		0.0273571	0.25185	0.0437478
Ki67	0.839755	1.39285	0.767395	1.61109	1.94267	2.16301	1.23374	1.99038	1.52948		Ki67	1	1.90559	1.58453		0.0236083	0.119312	0.303846
