# Supplementary material for: VGLL4 plays a critical role in heart valve development and homeostasis
Source: PLoS Genet. 2019 Feb 21;15(2):e1007977. doi: 10.1371/journal.pgen.1007977 (PMC6400400; doi:10.1371/journal.pgen.1007977)
Supplement: S1 Data — (ZIP) [file pgen.1007977.s001.zip › Supporting information source data/figure7 data.xlsx]

## Sheet: Fig7B
Edu positive cells per valve
AV																				PV
	Vgll4 fl/-						Tie2Cre+;Vgll4 fl/-						Tie2Cre+;Vgll4 fl/-;Yap/+								Vgll4 fl/-						Tie2Cre+;Vgll4 fl/-						Tie2Cre+;Vgll4 fl/-;Yap/+
	VEC	Total VEC	EdU+ VEC	VIC	Total VIC	EdU+ VIC	VEC	Total VEC	EdU+ VEC	VIC	Total VIC	EdU+ VIC	VEC	Total VEC	EdU+ VEC	VIC	Total VIC	EdU+ VIC			VEC	Total VEC	EdU+ VEC	VIC	Total VIC	EdU+ VIC	VEC	Total VEC	EdU+ VEC	VIC	Total VIC	EdU+ VIC	VEC	Total VEC	EdU+ VEC	VIC	Total VIC	EdU+ VIC
	2	44	0.0454545	8	86	0.0930233	12	63	0.190476	34	117	0.290598	2	45	0.0444444	3	79	0.0379747			2	47	0.0425532	9	72	0.125	3	57	0.0526316	15	81	0.185185	1	51	0.0196078	11	79	0.139241
	0	54	0	7	118	0.059322	9	51	0.176471	21	97	0.216495	3	39	0.0769231	15	110	0.136364			0	52	0	7	93	0.0752688	6	63	0.0952381	27	98	0.27551	2	53	0.0377358	19	91	0.208791
	3	48	0.0625	12	97	0.123711	4	49	0.0816327	29	102	0.284314	3	50	0.06	12	108	0.111111			3	55	0.0545455	8	78	0.102564	3	49	0.0612245	22	108	0.203704	0	49	0	6	98	0.0612245
	2	46	0.0434783	8	111	0.0720721	2	52	0.0384615	11	99	0.111111	2	44	0.0454545	9	95	0.0947368			0	60	0	14	113	0.123894	1	55	0.0181818	31	111	0.279279	3	61	0.0491803	18	103	0.174757
	1	52	0.0192308	11	96	0.114583	6	58	0.103448	19	128	0.148438	1	41	0.0243902	1	84	0.0119048			5	49	0.102041	5	81	0.0617284	2	51	0.0392157	13	91	0.142857	4	58	0.0689655	5	71	0.0704225
	4	61	0.0655738	16	107	0.149533	5	54	0.0925926	23	112	0.205357	0	48	0	7	119	0.0588235			2	57	0.0350877	8	93	0.0860215	3	61	0.0491803	12	98	0.122449	2	55	0.0363636	9	88	0.102273
							4	47	0.0851064	12	108	0.111111									1	44	0.0227273	12	101	0.118812	5	55	0.0909091	8	81	0.0987654	1	48	0.0208333	7	82	0.0853659
							1	41	0.0243902	25	103	0.242718									3	58	0.0517241	6	91	0.0659341	2	44	0.0454545	15	91	0.164835	3	44	0.0681818	12	109	0.110092
Mean	2	50.8333	0.0393729	10.3333	102.5	0.102041	5.375	51.875	0.0990723	21.75	108.25	0.200924	1.83333	44.5	0.0418687	7.83333	99.1667	0.0789916		Mean	2	52.75	0.0385848	8.625	90.25	0.0949028	3.125	54.375	0.0565045	17.875	94.875	0.184073	2	52.375	0.0376085	10.875	90.125	0.119021
SEM	0.5	2.19564	0.00898766	1.19722	4.11552	0.0119234	1.28087	2.37876	0.0207694	2.78228	3.68273	0.0253161	0.41332	1.46202	0.00953353	1.87639	5.57412	0.0166377		SEM	0.597614	2.01556	0.0117345	1.068	4.66273	0.00923963	0.580563	2.21148	0.00912661	2.81855	3.93445	0.0235111	0.46291	1.96339	0.00852862	1.86545	4.52153	0.0183075
ttest			0.0392001			0.00883204			0.048055			0.00285922								ttest			0.248019			0.00333139			0.152592			0.0465512
			0.872255			0.281801																	0.947294			0.259172
AV																				PV
VEC ttest																				VEC ttest
Vgll4 fl/-;Yap fl/+VSTie2Cre+;Vgll4 fl/-	0.0392001																			Vgll4 fl/-;Yap fl/+VSTie2Cre+;Vgll4 fl/-	0.248019
Vgll4 fl/-;Yap fl/+VSTie2Cre+;Vgll4 fl/-;Yap fl/+	0.872255																			Vgll4 fl/-;Yap fl/+VSTie2Cre+;Vgll4 fl/-;Yap fl/+	0.947294
Tie2Cre+;Vgll4 fl/-VSTie2Cre+;Vgll4 fl/-;Yap fl/+	0.048055																			Tie2Cre+;Vgll4 fl/-VSTie2Cre+;Vgll4 fl/-;Yap fl/+	0.152592
VIC ttest																				VIC ttest
Vgll4 fl/-;Yap fl/+VSTie2Cre+;Vgll4 fl/-	0.00883204																			Vgll4 fl/-;Yap fl/+VSTie2Cre+;Vgll4 fl/-	0.00333139
Vgll4 fl/-;Yap fl/+VSTie2Cre+;Vgll4 fl/-;Yap fl/+	0.281801																			Vgll4 fl/-;Yap fl/+VSTie2Cre+;Vgll4 fl/-;Yap fl/+	0.259172
Tie2Cre+;Vgll4 fl/-VSTie2Cre+;Vgll4 fl/-;Yap fl/+	0.00285922																			Tie2Cre+;Vgll4 fl/-VSTie2Cre+;Vgll4 fl/-;Yap fl/+	0.0465512

## Sheet: Fig7D
TUNEL positive cells per valve
AV																				PV
	Vgll4 fl/-						Tie2Cre+;Vgll4 fl/-						Tie2Cre+;Vgll4 fl/-;Yap/+								Vgll4 fl/-						Tie2Cre+;Vgll4 fl/-						Tie2Cre+;Vgll4 fl/-;Yap/+
	VEC	Total VEC	TUNEL+ VEC	VIC	Total VIC	TUNEL+VIC	VEC	Total VEC	TUNEL+ VEC	VIC	Total VIC	TUNEL+VIC	VEC	Total VEC	TUNEL+ VEC	VIC	Total VIC	TUNEL+VIC			VEC	Total VEC	TUNEL+ VEC	VIC	Total VIC	TUNEL+VIC	VEC	Total VEC	TUNEL+ VEC	VIC	Total VIC	TUNEL+VIC	VEC	Total VEC	TUNEL+ VEC	VIC	Total VIC	TUNEL+VIC
	0	45	0	2	96	0.0208333	0	61	0	0	124	0	0	54	0	4	113	0.0353982			0	47	0	4	97	0.0412371	1	51	0.0196078	0	103	0	0	44	0	0	93	0
	0	47	0	0	108	0	0	54	0	0	98	0	1	57	0.0175439	1	99	0.010101			0	51	0	1	103	0.00970874	0	48	0	0	98	0	0	48	0	1	114	0.00877193
	1	58	0.0172414	2	99	0.020202	0	48	0	1	92	0.0108696	0	61	0	2	101	0.019802			1	39	0.025641	5	91	0.0549451	0	44	0	1	87	0.0114943	1	51	0.0196078	0	94	0
	2	56	0.0357143	5	112	0.0446429	0	53	0	0	109	0	0	66	0	1	104	0.00961538			1	55	0.0181818	7	84	0.0833333	0	43	0	0	93	0	0	63	0	2	91	0.021978
	0	43	0	0	106	0	0	48	0	2	111	0.018018	2	48	0.0416667	2	87	0.0229885			1	44	0.0227273	1	111	0.00900901	0	58	0	1	101	0.00990099	0	59	0	4	88	0.0454545
	0	51	0	1	94	0.0106383	0	57	0	0	92	0	0	49	0	0	94	0			0	49	0	3	107	0.0280374	1	59	0.0169492	0	94	0	0	57	0	6	93	0.0645161
	0	62	0	4	89	0.0449438	0	41	0	0	88	0	1	54	0.0185185	1	97	0.0103093			0	57	0	2	88	0.0227273	0	42	0	0	88	0	0	44	0	3	103	0.0291262
	0	48	0	1	91	0.010989	1	62	0.016129	0	93	0	2	58	0.0344828	3	92	0.0326087			0	62	0	3	104	0.0288462	0	48	0	2	99	0.020202	0	48	0	0	108	0
	0	44	0	3	107	0.0280374	0	48	0	0	105	0	0	54	0	2	82	0.0243902			0	53	0	1	93	0.0107527	0	59	0	0	93	0	1	51	0.0196078	1	91	0.010989
	0	57	0	2	94	0.0212766	0	53	0	1	102	0.00980392	0	49	0	1	91	0.010989			1	49	0.0204082	4	95	0.0421053	0	44	0	0	95	0	1	57	0.0175439	3	94	0.0319149
Mean	0.3	51.1	0.00529557	2	99.6	0.0201563	0.1	52.5	0.0016129	0.4	101.4	0.00386915	0.6	55	0.0112212	1.7	96	0.0176202		Mean	0.4	50.6	0.00869583	3.1	97.3	0.0330702	0.2	49.6	0.0036557	0.4	95.1	0.00415973	0.3	52.2	0.00567595	2	96.9	0.0212751
SEM	0.213437	2.12106	0.00378938	0.516398	2.54384	0.00501667	0.1	2.05075	0.0016129	0.221108	3.51568	0.00207956	0.266667	1.80739	0.00507362	0.366667	2.80872	0.00357248		SEM	0.163299	2.08806	0.00359767	0.622718	2.76104	0.0073983	0.133333	2.15613	0.00244518	0.221108	1.6563	0.00227361	0.152753	2.05913	0.00289551	0.632456	2.68514	0.00687168
ttest			0.35885			0.00522745			0.0878682			0.00375408								ttest			0.214866			0.00090321			0.600504			0.0294864
			0.361792			0.685355																	0.499986			0.257986
AV																				PV
VEC ttest																				VEC ttest
Vgll4 fl/-;Yap fl/+VSTie2Cre+;Vgll4 fl/-	0.35885																			Vgll4 fl/-;Yap fl/+VSTie2Cre+;Vgll4 fl/-	0.214866
Vgll4 fl/-;Yap fl/+VSTie2Cre+;Vgll4 fl/-;Yap fl/+	0.361792																			Vgll4 fl/-;Yap fl/+VSTie2Cre+;Vgll4 fl/-;Yap fl/+	0.499986
Tie2Cre+;Vgll4 fl/-VSTie2Cre+;Vgll4 fl/-;Yap fl/+	0.0878682																			Tie2Cre+;Vgll4 fl/-VSTie2Cre+;Vgll4 fl/-;Yap fl/+	0.600504
VIC ttest																				VIC ttest
Vgll4 fl/-;Yap fl/+VSTie2Cre+;Vgll4 fl/-	0.00522745																			Vgll4 fl/-;Yap fl/+VSTie2Cre+;Vgll4 fl/-	0.00090321
Vgll4 fl/-;Yap fl/+VSTie2Cre+;Vgll4 fl/-;Yap fl/+	0.685355																			Vgll4 fl/-;Yap fl/+VSTie2Cre+;Vgll4 fl/-;Yap fl/+	0.257986
Tie2Cre+;Vgll4 fl/-VSTie2Cre+;Vgll4 fl/-;Yap fl/+	0.00375408																			Tie2Cre+;Vgll4 fl/-VSTie2Cre+;Vgll4 fl/-;Yap fl/+	0.0294864
