# Supplementary material for: VGLL4 plays a critical role in heart valve development and homeostasis
Source: PLoS Genet. 2019 Feb 21;15(2):e1007977. doi: 10.1371/journal.pgen.1007977 (PMC6400400; doi:10.1371/journal.pgen.1007977)
Supplement: S1 Data — (ZIP) [file pgen.1007977.s001.zip › Supporting information source data/FigureR1 .xlsx]

## Sheet: Table R1
Table R1		Tie2Cre+;Vgll4 fl/-																			Vgll4 fl/-																T-test
																																									mean		sem
		1	2	3	4	5	6	7	8	9	10	11	12	13	14	15					1	2	3	4	5	6	7	8	9	10	11	12	13	14	15	16					Vgll4 fl/-	Tie2Cre+;Vgll4 fl/-	Vgll4 fl/-	Tie2Cre+;Vgll4 fl/-
Heart Rate	BPM	517.986	483.408	447.205	473.684	480	433.735	521.739	436.364	476.821	455.696	521.739	452.83	486.486	421.053	450					503.497	458.599	505.618	480	503.497	416.185		433.735	476.821	423.529	450	444.444	441.718	493.151	473.684	428.571	0.473185		Heart Rate	BPM	462.203	470.583	7.97821	8.3165
Heart Rate	BPM	535.814	493.32	449.93	469.208	497.066	445.959	487.557	437.291	454.617	467.608	505.352	447.622	489.629	444.444	387.566					512.182	476.112	506.775	464.891	506.151	433.018	466.095	434.848	458.599	399.556	460.653	447.136	439.762	467.76	448.878	458.672	0.599837		Heart Rate	BPM	461.318	467.532	7.39113	9.18144
Diameter;s	mm	1.80845	2.38651	1.51003	2.34068	2.59141	2.72053	2.23811	2.14443	2.53913	2.23827	2.2669	2.39126	2.63691	2.20302	1.96548					2.39404	3.1019	2.53036	3.41836	2.39427	2.3939	2.36415	2.56744	2.2794	2.27752	2.75534	2.50923	3.02915	2.65051	2.45628	2.37736	0.00871635		Diameter;s	mm	2.5937	2.26541	0.0817982	0.0831493
Diameter;d	mm	3.04328	3.82008	3.13835	3.70908	3.6889	3.82117	3.11978	3.38241	3.90429	3.35539	3.52304	3.5984	3.72073	3.26191	3.44313					3.57041	4.53051	3.73486	4.3373	3.68874	3.79827	3.5682	3.65258	3.44011	3.61403	3.9533	3.77676	4.0267	3.82855	3.73578	3.78453	0.00431283		Diameter;d	mm	3.81504	3.502	0.0709531	0.0719104
Volume;s	uL	9.87382	19.9422	6.1887	18.9647	24.4174	27.5267	16.9209	15.2545	23.2365	17.0218	17.5799	20.04	25.5037	16.2616	12.185					20.0437	38.2585	23.0392	48.0844	20.0438	20.1006	19.4154	23.865	17.7206	17.7729	28.4135	22.5272	35.8418	25.8159	21.3633	19.6888	0.0124459		Volume;s	uL	25.1247	18.0612	2.14137	1.50663
Volume;d	uL	36.2707	62.8339	39.1133	58.6086	57.7788	62.7796	38.5528	46.8752	66.0969	45.9617	51.6841	54.5147	58.9632	42.997	48.9473					53.4017	94.0228	59.4941	84.8054	57.8103	61.9004	53.3263	56.3666	49.0148	54.9465	68.0956	61.0888	71.1298	63.0787	59.5287	61.3773	0.00560294		Volume;d	uL	63.0867	51.4652	2.94304	2.49513
Stroke Volume	uL	26.3969	42.8918	32.9246	39.6439	33.3614	35.2529	21.6319	31.6206	42.8605	28.9398	34.1042	34.4747	33.4595	26.7353	36.7624					33.3581	55.7643	36.4549	36.7211	37.7665	41.7998	33.9108	32.5016	31.2942	37.1736	39.6821	38.5615	35.2881	37.2628	38.1655	41.6884	0.0358692		Stroke Volume	uL	37.9621	33.404	1.4037	1.52785
Ejection Fraction	%	72.7774	68.2621	84.1775	67.6417	57.7399	56.1535	56.1098	67.4571	64.8449	62.9651	65.9859	63.2393	56.7465	62.1796	75.106					62.4663	59.3093	61.2748	43.3004	65.3283	67.5275	63.5912	57.6612	63.8465	67.6542	58.2741	63.1238	49.6108	59.0735	64.1127	67.9216	0.0889984		Ejection Fraction	%	60.8798	65.4257	1.64909	2.00672
Fractional Shortening	%	40.5758	37.5272	51.8846	36.8932	29.7512	28.8037	28.2606	36.6006	34.9656	33.2934	35.655	33.5466	29.1294	32.4624	42.9159					32.9477	31.533	32.2502	21.187	35.0926	36.974	33.7439	29.7088	33.7406	36.9811	30.303	33.5613	24.7735	30.7698	34.2497	37.1823	0.0960113		Fractional Shortening	%	32.1874	35.4843	1.07809	1.61182
Cardiac Output	mL/min	14.1438	21.1593	14.8137	18.6012	16.5828	15.7213	10.5468	13.8274	19.4851	13.5325	17.2346	15.4316	16.6805	11.8824	14.2478					17.0854	26.55	18.4744	17.0713	19.1156	18.1001	15.8057	14.1333	14.3515	14.8529	18.2796	17.2422	15.5183	17.4301	17.1316	19.1213	0.0706309		Cardiac Output	mL/min	17.5165	15.5927	0.720734	0.727667
IVS;d	mm	1.17963	1.27037	1.15694	0.930093	0.793981	1.0662	0.952778	0.839352	0.862037	0.65787	1.0662	0.816667	0.862037	1.17963	1.0662					0.839352	0.793981	1.13426	0.930093	1.49722	1.02083	0.862037	0.748611	0.884722	0.884722	0.748611	1.17963	0.725926	0.793981	1.08889	0.884722	0.550578		IVS;d	mm	0.938599	0.98	0.0508892	0.0454352
IVS;s	mm	1.72407	1.70139	1.95093	1.54259	1.225	1.45185	1.29306	1.24768	1.49722	1.15694	1.70139	1.225	1.27037	1.81482	1.65602					1.13426	1.61065	1.3838	1.17963	2.17778	1.3838	1.15694	1.40648	1.40648	1.0662	1.29306	1.65602	1.24768	1.33843	1.45185	1.24768	0.234034		IVS;s	mm	1.3838	1.49722	0.0666227	0.0651112
LVID;d	mm	3.10787	3.78843	3.0625	3.69768	3.74306	3.90185	2.99444	3.13056	3.92454	3.28935	3.56157	3.76574	3.8338	3.24398	3.53889					3.53889	4.46898	3.62963	4.37824	3.28935	3.87917	3.42546	3.81111	3.26667	3.60694	3.96991	3.90185	4.01528	3.90185	3.74306	3.78843	0.0260195		LVID;d	mm	3.78843	3.50562	0.0842971	0.0861089
LVID;s	mm	1.9963	2.35926	1.47454	2.42732	2.56343	2.72222	2.04167	1.90556	2.47268	2.06435	2.33657	2.45	2.6088	2.10972	1.95093					2.54074	3.17593	2.67685	3.42546	2.01898	2.51806	2.31389	2.69954	2.13241	2.40463	2.76759	2.49537	3.10787	2.74491	2.35926	2.42732	0.0058315		LVID;s	mm	2.61305	2.23222	0.0939502	0.086107
LVPW;d	mm	1.76944	1.15694	1.81482	0.862037	0.839352	0.725926	0.771296	1.15694	0.635185	0.748611	1.04352	0.907407	0.635185	0.65787	0.748611					1.33843	1.04352	1.61065	0.816667	1.72407	0.56713	0.680556	0.862037	0.975463	0.839352	0.748611	0.952778	0.771296	0.862037	1.24768	0.725926	0.872983		LVPW;d	mm	0.985388	0.964876	0.0829631	0.0970783
LVPW;s	mm	1.97361	1.51991	2.04167	1.31574	1.08889	1.13426	1.02083	1.63333	1.15694	1.24768	1.29306	1.36111	1.0662	0.907407	1.27037					1.74676	0.862037	1.70139	0.930093	1.8375	0.952778	1.08889	1.0662	1.15694	1.20232	0.975463	1.3838	0.975463	1.08889	1.88287	1.0662	0.465614		LVPW;s	mm	1.24485	1.3354	0.0874649	0.0853945
LV Mass	mg	202.376	195.622	201.121	120.984	108.423	131.839	82.3496	109.593	104.173	71.5586	144.505	117.99	100.2	102.218	114.912					150.055	170.129	222.404	153.587	253.127	110.603	86.7944	109.534	105.193	110.122	106.188	168.815	108.223	118.229	181.403	108.47	0.381692		LV Mass	mg	141.43	127.191	11.8395	10.7007
LV Mass (Corrected)	mg	161.901	156.497	160.897	96.7871	86.7382	105.471	65.8797	87.6742	83.3382	57.2468	115.604	94.3919	80.1604	81.7747	91.9299					120.044	136.103	177.923	122.87	202.502	88.4826	69.4355	87.6268	84.1544	88.0979	84.9505	135.052	86.5783	94.5835	145.123	86.7764	0.381692		LV Mass (Corrected)	mg	113.144	101.753	9.47163	8.56058
LV Vol;d	uL	38.1507	61.5027	36.8074	58.0394	59.7575	65.9845	34.8417	38.8323	66.9013	43.7891	53.0473	60.6267	63.275	42.3397	52.2389					52.2389	90.956	55.513	86.6722	43.7891	65.0746	48.2976	62.3855	43.0611	54.6843	68.7553	65.9845	70.6365	65.9845	59.7575	61.5027	0.0271564		LV Vol;d	uL	62.2058	51.7423	3.34309	2.97404
LV Vol;s	uL	12.6674	19.3146	5.79222	20.7382	23.7563	27.5683	13.4124	11.2495	21.7188	13.794	18.8526	21.2253	24.8133	14.5755	11.9464					23.2374	40.2154	26.447	48.2976	13.0368	22.7248	18.397	27.0044	14.9754	20.2574	28.7155	22.2186	38.1507	28.1387	19.3146	20.7382	0.00718107		LV Vol;s	uL	25.7418	17.4283	2.36678	1.55921
Table R1
Echocardiographic parameters
	Vgll4fl/-	Tie2Cre;Vgll4fl/-
n	15	16
HR (BPM)	462.23±7.75	474.93±7.73
IVS;d (Depth, mm)	0.98±0.05	1.03±0.06
IVS;s (Depth, mm)	1.42±0.06	1.49±0.07
LVID;d (Depth, mm)	3.67±0.1	3.49±0.07
LVID;s (Depth, mm)	2.5±0.1	2.35±0.13
LVPW;d (Depth, mm)	1.06±0.09	0.98±0.08
LVPW;s (Depth, mm)	1.33±0.09	1.31±0.08
LV Vol;d (ul)	58.16±3.59	51.24±2.54
LV Vol;s (ul)	23.45±2.34	21.08±3.79
%EF	60.88±1.65	65.43±2.01
% FS	32.19±1.08	35.48±1.61
LV Mass (AW) (mg)	145.83±11.2	132.72±10.52
LV Mass (AW) Corrected (mg)	116.66±8.96	106.18±8.41
