# Supplementary material for: VGLL4 plays a critical role in heart valve development and homeostasis
Source: PLoS Genet. 2019 Feb 21;15(2):e1007977. doi: 10.1371/journal.pgen.1007977 (PMC6400400; doi:10.1371/journal.pgen.1007977)
Supplement: S1 Data — (ZIP) [file pgen.1007977.s001.zip › Supporting information source data/Table S1 data.xlsx]

## Sheet: TableS1
Vgll4 +/- mice heart function
																				MEAN					SEM
		Vgll4-/-	Vgll4-/-	Vgll4-/-	Vgll4-/-	Vgll4-/-	Vgll4+/-	Vgll4+/-	Vgll4+/-	Vgll4+/-	Vgll4+/-	Vgll4+/+	Vgll4+/+	Vgll4+/+	Vgll4+/+	Vgll4+/+				Vgll4-/-	Vgll4+/-	Vgll4+/+	TTEST		Vgll4-/-	Vgll4+/-	Vgll4+/+
Heart Rate	BPM	500.695	530.778	484.441	531.169	437.026	536.113	488.384	478.485	473.295	526.99	470.281	465.793	438.556	588.596	423.467		Heart Rate	BPM	496.822	500.653	477.339	0.581759	0.485263	17.4307	12.9257	29.1269				MEAN				SEM				Table S1
Diameter;s	mm	1.8462	2.06799	1.65236	2.04637	2.297	1.98602	2.38686	2.80459	2.91397	2.03014	2.64144	2.81533	2.77647	2.5944	2.73061		Diameter;s	mm	1.98198	2.42432	2.71165	0.00024346	0.180548	0.109057	0.191475	0.0412226				Vgll4+/+	Vgll4+/-	Vgll4-/-		Vgll4+/+	Vgll4+/-	Vgll4-/-		Echocardiographic parameters
Diameter;d	mm	2.81292	3.43399	3.01405	3.40089	3.50327	3.19181	3.78631	4.1339	4.00532	3.49231	3.89473	4.21264	4.32038	3.98205	4.19045		Diameter;d	mm	3.23303	3.72193	4.12005	0.000470491	0.0677777	0.135284	0.171455	0.0785727		Heart Rate	BPM	477.34	500.65	496.82		29.13	12.93	17.43			Vgll4+/+	Vgll4+/-	Vgll4-/-
Volume;s	uL	10.3775	13.8686	7.80246	13.5072	18.1256	12.5899	19.8853	29.6785	32.6293	13.2778	25.5901	29.9785	29.0044	24.4775	27.8066		Volume;s	uL	12.7363	21.6121	27.3714	9.00885e-05	0.212536	1.74396	4.12486	1.02958		IVS;d	mm	0.9	1	1.08		0.07	0.09	0.08		n	5	5	5
Volume;d	uL	29.9704	48.6142	35.5416	47.4791	51.0547	40.7257	61.4697	75.685	70.2452	50.6775	65.7302	79.1867	84.0602	69.257	78.184		Volume;d	uL	42.532	59.7606	75.2836	0.000276955	0.0634634	4.12773	6.36893	3.37832		IVS;s	mm	1.52	1.52	1.65		0.05	0.17	0.12		HR (BPM)	477.34±29.13	500.65±12.93	496.82±17.43
Stroke Volume	uL	19.593	34.7456	27.7392	33.972	32.9291	28.1358	41.5844	46.0065	37.6158	37.3998	40.1401	49.2082	55.0558	44.7796	50.3774		Stroke Volume	uL	29.7958	38.1485	47.9122	0.00141754	0.0366124	2.82919	2.95511	2.53975		LVID;d	mm	4.13	3.71	3.33		0.07	0.2	0.13		IVS;d (Depth, mm)	0.9±0.07	1±0.09	1.08±0.08
Ejection Fraction	%	65.3743	71.4721	78.047	71.5514	64.4977	69.0861	67.6503	60.7869	53.5494	73.7995	61.068	62.142	65.4957	64.657	64.4344		Ejection Fraction	%	70.1885	64.9744	63.5594	0.0339721	0.70707	2.45787	3.53565	0.834741		LVID;s	mm	2.76	2.41	1.99		0.05	0.22	0.11		IVS;s (Depth, mm)	1.52±0.05	1.52±0.17	1.65±0.12
Fractional Shortening	%	34.3674	39.779	40.1781	39.8284	34.4326	37.7776	36.9608	32.1563	27.2476	41.8683	32.1792	33.1696	35.7355	34.8475	34.8373		Fractional Shortening	%	37.7171	35.2021	34.1538	0.0450287	0.697191	1.35598	2.51709	0.644899		LVPW;d	mm	0.78	1.07	1.01		0.05	0.09	0.09		LVID;d (Depth, mm)	4.13±0.07	3.71±0.2	3.33±0.13
Cardiac Output	mL/min	9.81011	18.4422	13.438	18.0449	14.3909	15.084	20.3092	22.0134	17.8034	19.7093	18.5144	22.9431	24.1451	26.3571	21.3332		Cardiac Output	mL/min	14.8252	18.9838	22.6586	0.00534156	0.0721117	1.59237	1.18456	1.321		LVPW;s	mm	1.15	1.4	1.45		0.08	0.11	0.14		LVID;s (Depth, mm)	2.76±0.05	2.41±0.22	1.99±0.11
IVS;d	mm	1.11157	1.36111	1.0662	0.884722	0.998148	1.24768	0.725926	1.02083	1.11157	0.907407	1.15694	0.884722	0.907407	0.748611	0.816667		IVS;d	mm	1.08435	1.00269	0.90287	0.1226	0.401623	0.0790409	0.0888495	0.069329		LV Vol;d	uL	75.77	59.41	45.4		2.82	7.13	4		LVPW;d (Depth, mm)	0.78±0.05	1.07±0.09	1.01±0.09
IVS;s	mm	1.58796	1.86018	1.92824	1.24768	1.63333	2.10972	1.08889	1.63333	1.51991	1.27037	1.72407	1.51991	1.40648	1.49722	1.45185		IVS;s	mm	1.65148	1.52444	1.51991	0.347269	0.980808	0.11991	0.174455	0.0546332		LV Vol;s	uL	28.67	21.52	12.81		1.29	4.63	1.74		LVPW;s (Depth, mm)	1.15±0.08	1.4±0.11	1.45±0.14
LVID;d	mm	2.83565	3.40278	3.38009	3.40278	3.60694	3.03981	3.85648	4.10602	4.03796	3.49352	3.94722	4.17407	4.2875	4.01528	4.24213		LVID;d	mm	3.32565	3.70676	4.13324	0.00052635	0.0747869	0.129246	0.197713	0.0655127		Ejection Fraction	%	63.56	64.97	70.19		0.83	3.54	2.46		LV Vol;d (ul)	75.77±2.82	59.41±7.13	45.4±4
LVID;s	mm	1.95093	1.95093	1.61065	2.15509	2.26852	1.8375	2.42732	2.76759	2.99444	2.01898	2.58611	2.79028	2.83565	2.72222	2.88102		LVID;s	mm	1.98722	2.40917	2.76306	0.000236308	0.152753	0.112194	0.21799	0.051431		Fractional Shortening	%	34.15	35.2	37.72		0.64	2.52	1.36		LV Vol;s (ul)	28.67±1.29	21.52±4.63	12.81±1.74
LVPW;d	mm	1.20232	1.15694	1.0662	0.725926	0.907407	0.975463	0.816667	1.36111	1.04352	1.15694	0.65787	0.884722	0.862037	0.839352	0.65787		LVPW;d	mm	1.01176	1.07074	0.78037	0.0511751	0.0236834	0.0874484	0.0911368	0.0505224		LV Mass	mg	133.12	152.12	130.15		7.07	19.98	13.91		%EF	63.56±0.83	64.97±3.54	70.19±2.46
LVPW;s	mm	1.54259	1.79213	1.6787	1.04352	1.20232	1.15694	1.29306	1.56528	1.24768	1.74676	1.08889	1.36111	1.29306	1.13426	0.884722		LVPW;s	mm	1.45185	1.40194	1.15241	0.10692	0.108076	0.142213	0.10983	0.0834741		LV Mass (Corrected)	mg	106.5	121.7	104.12	±	5.66	15.98	11.13		% FS	34.15±0.64	35.2±2.52	37.72±1.36
LV Mass	mg	119.782	177.074	135.726	91.1995	126.976	123.926	105.329	214.683	180.788	135.884	136.685	144.506	150.993	117.078	116.338		LV Mass	mg	130.152	152.122	133.12	0.853847	0.396146	13.9063	19.9798	7.07383												LV Mass (AW) (mg)	133.12±7.07	152.12±19.98	130.15±13.91
LV Mass (Corrected)	mg	95.8254	141.66	108.581	72.9596	101.581	99.1406	84.2633	171.746	144.63	108.707	109.348	115.605	120.794	93.6622	93.0703		LV Mass (Corrected)	mg	104.121	121.698	106.496	0.853847	0.396146	11.125	15.9838	5.65906												LV Mass (AW) Corrected (mg)	106.5±5.66	121.7±15.98	104.12±11.13
LV Vol;d	uL	30.4849	47.5295	46.768	47.5295	54.6843	36.1456	64.1714	74.481	71.5874	50.6422	67.8249	77.4362	82.4986	70.6365	80.4531		LV Vol;d	uL	45.3992	59.4055	75.7699	0.000257888	0.0653456	3.9975	7.12812	2.82364
LV Vol;s	uL	11.9464	11.9464	7.29265	15.3815	17.5044	10.2487	20.7382	28.7155	34.8417	13.0368	24.2816	29.2988	30.4849	27.5683	31.697		LV Vol;s	uL	12.8143	21.5162	28.6661	8.26346e-05	0.175241	1.74043	4.63066	1.29081
																																							Table S1
																																							Echocardiographic parameters
																																								Vgll4+/+	Vgll4+/-	Vgll4-/-
																																							n	5	5	5
																																							HR (BPM)	477.34±29.13	500.65±12.93	496.82±17.43
																																							IVS;d (Depth, mm)	0.9±0.07	1±0.09	1.08±0.08
																																							IVS;s (Depth, mm)	1.52±0.05	1.52±0.17	1.65±0.12
																																							LVID;d (Depth, mm)	4.13±0.07	3.71±0.2	3.33±0.13B
																																							LVID;s (Depth, mm)	2.76±0.05	2.41±0.22	1.99±0.11B
																																							LVPW;d (Depth, mm)	0.78±0.05	1.07±0.09	1.01±0.09
																																							LVPW;s (Depth, mm)	1.15±0.08	1.4±0.11	1.45±0.14
																																							LV Vol;d (ul)	75.77±2.82	59.41±7.13	45.4±4B
																																							LV Vol;s (ul)	28.67±1.29	21.52±4.63	12.81±1.74B
																																							%EF	63.56±0.83	64.97±3.54	70.19±2.46A
																																							% FS	34.15±0.64	35.2±2.52	37.72±1.36A
																																							LV Mass (AW) (mg)	133.12±7.07	152.12±19.98	130.15±13.91
																																							LV Mass (AW) Corrected (mg)	106.5±5.66	121.7±15.98	104.12±11.13
																																							AP < 0.05, BP < 0.005 versus Vgll4+/+ line.
