# Supplementary material for: VGLL4 plays a critical role in heart valve development and homeostasis
Source: PLoS Genet. 2019 Feb 21;15(2):e1007977. doi: 10.1371/journal.pgen.1007977 (PMC6400400; doi:10.1371/journal.pgen.1007977)
Supplement: S1 Data — (ZIP) [file pgen.1007977.s001.zip › Supporting information source data/Table S2 data.xlsx]

## Sheet: TableS2
														Mean		SEM
		Vgll4fl/-						Tie2Cre+;Vgll4fl/-						Vgll4fl/-	Tie2Cre+;Vgll4 fl/-	Vgll4fl/-	Tie2Cre+;Vgll4 fl/-
Heart Rate	BPM	457.942	541.15	504.82	478.485	473.295	486.815	485.421	521.078	461.835	497.323	0.956835		490.418	491.414	11.9504	12.3348
Diameter;s	mm	1.86569	2.41812	2.48035	2.80459	2.91397	2.05878	2.398	2.54651	3.14911	3.9441	0.130015		2.42358	3.00943	0.166655	0.351338
Diameter;d	mm	3.33625	3.59773	3.4274	4.1339	4.00532	3.9249	3.31846	3.47907	4.2776	5.16156	0.415155		3.73759	4.05917	0.134248	0.423097
Volume;s	uL	10.6641	20.5635	21.8973	29.6785	32.6293	13.7203	20.128	23.3842	39.4403	67.7146	0.132874		21.5255	37.6668	3.51056	10.869
Volume;d	uL	45.3549	54.3505	48.4227	75.685	70.2452	66.9233	44.7627	50.1695	82.1332	127.307	0.356653		60.1636	76.093	5.09635	18.9582
Stroke Volume	uL	34.6908	33.787	26.5254	46.0065	37.6158	53.203	24.6347	26.7853	42.6929	59.5921	0.979659		38.6381	38.4262	3.88719	8.12362
Cardiac Output	mL/min	15.8864	18.2838	13.3906	22.0134	17.8034	25.9	11.9582	13.9572	19.717	29.6366	0.987556		18.8796	18.8173	1.82309	3.96373
IVS;d	mm	1.08889	1.56528	1.42917	1.02083	1.11157	1.42917	1.33843	0.952778	2.10972	1.13426	0.649335		1.27415	1.3838	0.0926891	0.254472
IVS;s	mm	1.74676	1.9963	2.26852	1.63333	1.51991	1.90556	2.06435	1.49722	2.45	1.72407	0.689721		1.84506	1.93391	0.110463	0.207784
LVID;d	mm	3.49352	3.58426	3.675	4.10602	4.03796	3.78843	3.90185	3.675	4.31018	5.24028	0.134305		3.78086	4.28183	0.100716	0.345453
LVID;s	mm	2.01898	2.58611	2.31389	2.76759	2.99444	2.22315	2.88102	2.72222	3.33472	4.01528	0.0338395		2.48403	3.23831	0.148843	0.289681
LVPW;d	mm	0.975463	1.47454	1.74676	1.36111	1.04352	0.793981	1.49722	1.70139	1.40648	1.02083	0.439476		1.23256	1.40648	0.145335	0.142574
LVPW;s	mm	1.24768	1.72407	1.88287	1.56528	1.24768	1.36111	1.51991	1.95093	1.45185	1.225	0.862919		1.50478	1.53692	0.107632	0.151718
EF	%	74.257	54.9192	67.8321	61.4459	51.3298	72.9498	51.9629	51.7956	45.8107	46.4231	0.0184244		63.7889	48.9981	3.86971	1.66849
FS	%	42.2078	27.8481	37.037	32.5967	25.8427	41.3174	26.1628	25.9259	22.6316	23.3766	0.023653		34.475	24.5242	2.79964	0.892036
LV Mass	mg	135.884	257.571	121.766	214.683	180.788	171.513	259.499	214.71	420.475	274.373	0.0332702		180.367	292.264	20.5178	44.5779
LV Mass (Corrected)	mg	108.707	206.057	97.4125	171.746	144.63	137.21	207.599	171.768	336.38	219.498	0.0332702		144.294	233.811	16.4143	35.6624
LV Vol;d	uL	50.6422	53.8624	57.1905	74.481	71.5874	61.5027	65.9845	57.1905	83.5317	131.841	0.139135		61.5444	84.637	3.9372	16.6601
LV Vol;s	uL	13.0368	24.2816	18.397	28.7155	34.8417	16.6366	31.697	27.5683	45.2652	70.6365	0.0419511		22.6516	43.7918	3.34042	9.7138
										Mean		SEM
		MEAN		SEM						Vgll4fl/-	Tie2Cre+;Vgll4 fl/-	Vgll4fl/-	Tie2Cre+;Vgll4 fl/-
		Vgll4fl/-	Tie2Cre+;Vgll4 fl/-	Vgll4fl/-	Tie2Cre+;Vgll4 fl/-			Heart Rate	BPM	490.418	491.414	11.9504	12.3348
Heart Rate	BPM	490.42	491.41	11.95	12.33			Diameter;s	mm	2.42358	3.00943	0.166655	0.351338
IVS;d	mm	1.27	1.38	0.09	0.25			Diameter;d	mm	3.73759	4.05917	0.134248	0.423097
IVS;s	mm	1.85	1.93	0.11	0.21			Volume;s	uL	21.5255	37.6668	3.51056	10.869
LVID;d	mm	3.78	4.28	0.1	0.35			Volume;d	uL	60.1636	76.093	5.09635	18.9582
LVID;s	mm	2.48	3.24	0.15	0.29			Stroke Volume	uL	38.6381	38.4262	3.88719	8.12362
LVPW;d	mm	1.23	1.41	0.15	0.14			Ejection Fraction	%	64.5443	51.8034	4.48069	1.77761
LVPW;s	mm	1.5	1.54	0.11	0.15			Fractional Shortening	%	35.2412	26.1277	3.49682	0.893032
LV Vol;d	uL	61.54	84.64	3.94	16.66			Cardiac Output	mL/min	18.8796	18.8173	1.82309	3.96373
LV Vol;s	uL	22.65	43.79	3.34	9.71			IVS;d	mm	1.27415	1.3838	0.0926891	0.254472
Ejection Fraction	%	63.79	49	3.87	1.67			IVS;s	mm	1.84506	1.93391	0.110463	0.207784
Fractional Shortening	%	34.47	24.52	2.8	0.89			LVID;d	mm	3.78086	4.28183	0.100716	0.345453
LV Mass	mg	180.37	292.26	20.52	44.58			LVID;s	mm	2.48403	3.23831	0.148843	0.289681
LV Mass (Corrected)	mg	144.29	233.81	16.41	35.66			LVPW;d	mm	1.23256	1.40648	0.145335	0.142574
								LVPW;s	mm	1.50478	1.53692	0.107632	0.151718
							±	EF	%	63.7889	48.9981	3.86971	1.66849
								FS	%	34.475	24.5242	2.79964	0.892036
								LV Mass	mg	180.367	292.264	20.5178	44.5779
								LV Mass (Corrected)	mg	144.294	233.811	16.4143	35.6624
								LV Vol;d	uL	61.5444	84.637	3.9372	16.6601
								LV Vol;s	uL	22.6516	43.7918	3.34042	9.7138
Echocardiographic parameters
	Vgll4 fl/-	Tie2 Cre+ Vgll4 fl/-
n	6	4
HR (BPM)	490.42±11.95	491.41±12.33
IVS;d (Depth, mm)	1.27±0.09	1.38±0.25
IVS;s (Depth, mm)	1.85±0.11	1.93±0.21
LVID;d (Depth, mm)	3.78±0.1	4.28±0.35
LVID;s (Depth, mm)	2.48±0.15	3.24±0.29
LVPW;d (Depth, mm)	1.23±0.15	1.41±0.14
LVPW;s (Depth, mm)	1.5±0.11	1.54±0.15
LV Vol;d (ul)	61.54±3.94	84.64±16.66
LV Vol;s (ul)	22.65±3.34	43.79±9.71
%EF	63.79±3.87	49±1.67
% FS	34.47±2.8	24.52±0.89
LV Mass (AW) (mg)	180.37±20.52	292.26±44.58
LV Mass (AW) Corrected (mg)	144.29±16.41	233.81±35.66
AP < 0.05 versus Vgll4 fl/- line.
Table S2
Echocardiographic parameters
	Vgll4fl/-	Tie2Cre+ Vgll4fl/-
n	6	4
HR (BPM)	490.42±11.95	491.41±12.33
IVS;d (Depth, mm)	1.27±0.09	1.38±0.25
IVS;s (Depth, mm)	1.85±0.11	1.93±0.21
LVID;d (Depth, mm)	3.78±0.1	4.28±0.35
LVID;s (Depth, mm)	2.48±0.15	3.24±0.29A
LVPW;d (Depth, mm)	1.23±0.15	1.41±0.14
LVPW;s (Depth, mm)	1.5±0.11	1.54±0.15
LV Vol;d (ul)	61.54±3.94	84.64±16.66
LV Vol;s (ul)	22.65±3.34	43.79±9.71A
%EF	63.79±3.87	49±1.67A
% FS	34.47±2.8	24.52±0.89A
LV Mass (AW) (mg)	180.37±20.52	292.26±44.58A
LV Mass (AW) Corrected (mg)	144.29±16.41	233.81±35.66A
AP < 0.05 versus Vgll4fl/- line.
