# Supplementary material for: VGLL4 plays a critical role in heart valve development and homeostasis
Source: PLoS Genet. 2019 Feb 21;15(2):e1007977. doi: 10.1371/journal.pgen.1007977 (PMC6400400; doi:10.1371/journal.pgen.1007977)
Supplement: S1 Data — (ZIP) [file pgen.1007977.s001.zip › Supporting information source data/Table S3 data.xlsx]

## Sheet: TableS3
		Vgll4fl/-;Yapfl/+							Tie2Cre+;Vgll4fl/-						Tie2Cre+;Vgll4fl/-;Yapfl/+
Heart Rate	BPM	450.704	460.358	474.699	497.667	523.732	499.307	530.68	489.047	493.743	500.608	408.163	538.519	495.271	503.497	487.557	392.959	482.008	487.97	0.54008	Heart Rate	BPM
Diameter;s	mm	1.64494	2.29129	2.74162	2.50976	2.21051	3.04782	2.1383	2.98346	2.73197	3.66928	2.41602	2.6111	2.78881	2.3012	2.17347	1.73996	2.13245	2.59739	0.0174014	Diameter;s	mm
Diameter;d	mm	3.0486	3.34325	4.15757	3.91517	3.83819	4.54151	3.23043	4.00448	3.88768	4.63886	3.55523	3.84084	4.00954	3.38393	3.46924	3.08424	3.96302	3.78378	0.0630416	Diameter;d	mm
Volume;s	uL	7.77376	17.9618	28.0726	22.5539	16.5063	36.4101	15.1083	34.6395	27.8314	56.9991	20.5637	24.9042	29.2631	18.1557	15.7206	8.9453	14.9926	24.5682	0.0320032	Volume;s	uL
Volume;d	uL	36.4992	45.5793	76.7679	66.5556	63.5534	94.4687	41.9199	70.248	65.4202	99.2965	52.8571	63.7633	70.4319	46.9205	49.8134	37.4897	68.5658	61.3797	0.0720853	Volume;d	uL
Stroke Volume	uL	28.7255	27.6175	48.6953	44.0017	47.0471	58.0586	26.8116	35.6085	37.5888	42.2974	32.2934	38.8591	41.1688	28.7647	34.0928	28.5444	53.5732	36.8115	0.726072	Stroke Volume	uL
Ejection Fraction	%	78.7016	60.5922	63.4318	66.1127	74.0277	61.458	63.9592	50.6897	57.4575	42.5971	61.0957	60.9427	58.4519	61.3053	68.441	76.1393	78.1339	59.9734	0.0174818	Ejection Fraction	%
Fractional Shortening	%	46.0428	31.4654	34.0572	35.8965	42.4075	32.8898	33.8076	25.4969	29.7274	20.9013	32.0432	32.0176	30.4456	31.9962	37.3501	43.5856	46.1914	31.3546	0.0181573	Fractional Shortening	%
Cardiac Output	mL/min	12.9467	12.7139	23.1156	21.8982	24.6401	28.989	14.2284	17.4142	18.5592	21.1744	13.181	20.9264	20.3897	14.483	16.6222	11.2168	25.8227	17.9629	0.605323	Cardiac Output	mL/min
IVS;d	mm	1.17963	0.998148	1.11157	0.907407	1.02083	0.930093	0.975463	0.975463	1.29306	0.748611	1.0662	1.13426	1.225	0.975463	1.02083	1.04352	0.703241	1.11157	0.368229	IVS;d	mm
IVS;s	mm	1.61065	1.54259	1.47454	1.42917	1.29306	1.49722	1.51991	1.36111	1.8375	1.17963	1.40648	1.65602	1.72407	1.58796	1.61065	1.51991	1.15694	1.40648	0.613031	IVS;s	mm
LVID;d	mm	2.94907	3.28935	4.24213	3.92454	3.675	4.35556	3.35741	4.01528	3.87917	4.55972	3.28935	3.8338	3.81111	3.38009	3.56157	3.0625	3.78843	3.47083	0.0663694	LVID;d	mm
LVID;s	mm	1.61065	2.10972	2.92639	2.79028	2.6088	2.79028	2.2912	3.17593	2.6088	3.675	2.40463	2.9037	2.54074	2.26852	2.13241	1.9963	2.13241	2.63148	0.022067	LVID;s	mm
LVPW;d	mm	1.65602	1.15694	1.13426	0.862037	1.49722	0.884722	1.3838	0.930093	1.225	1.15694	1.45185	1.225	0.816667	1.72407	0.930093	1.56528	0.884722	1.15694	0.536942	LVPW;d	mm
LVPW;s	mm	2.04167	1.17963	1.3838	1.0662	1.58796	1.31574	1.58796	1.0662	1.51991	1.27037	1.65602	1.11157	0.952778	1.81482	1.17963	1.70139	1.40648	1.29306	0.223004	LVPW;s	mm
LV Mass	mg	176.826	132.461	207.191	130.742	197.853	160.371	156.873	150.396	214.211	184.744	168.765	190.781	152.824	195.96	128.818	161.832	106.39	155.047	0.155145	LV Mass	mg
LV Mass (Corrected)	mg	141.461	105.969	165.752	104.593	158.283	128.297	125.498	120.317	171.369	147.796	135.012	152.625	122.259	156.768	103.054	129.465	85.1122	124.038	0.155145	LV Mass (Corrected)	mg
LV Vol;d	uL	33.5642	43.7891	80.4531	66.9013	57.1905	85.6185	46.0133	70.6365	65.0746	95.3501	43.7891	63.275	62.3855	46.768	53.0473	36.8074	61.5027	49.8539	0.0706431	LV Vol;d	uL
LV Vol;s	uL	7.29265	14.5755	32.9353	29.2988	24.8133	29.2988	17.9475	40.2154	24.8133	57.1905	20.2574	32.3129	23.2374	17.5044	14.9754	12.6674	14.9754	25.3515	0.0385005	LV Vol;s	uL
		Mean				SEM						Mean				SEM
		Vgll4fl/-;Yapfl/+	Tie2Cre+;Vgll4fl/-	Tie2Cre+;Vgll4fl/-;Yapfl/+		Vgll4fl/-;Yapfl/+	Tie2Cre+;Vgll4fl/-	Tie2Cre+;Vgll4fl/-;Yapfl/+				Vgll4fl/-;Yapfl/+	Tie2Cre+;Vgll4fl/-	Tie2Cre+;Vgll4fl/-;Yapfl/+		Vgll4fl/-;Yapfl/+	Tie2Cre+;Vgll4fl/-	Tie2Cre+;Vgll4fl/-;Yapfl/+
Heart Rate	BPM	491.021	487.559	470.798		11.5343	17.4841	19.7857		Heart Rate	BPM	491.021	487.559	470.798		11.5343	17.4841	19.7857
Diameter;s	mm	2.36918	2.86677	2.18889		0.170998	0.177992	0.138646		IVS;d	mm	1.01759	1.07377	0.970926		0.0368553	0.079596	0.0704337
Diameter;d	mm	3.72496	3.98944	3.53684		0.204161	0.146441	0.154177		IVS;s	mm	1.48102	1.52747	1.45639		0.0379318	0.102405	0.0828554
Volume;s	uL	20.6267	32.3668	16.4765		3.54563	5.28242	2.52772		LVID;d	mm	3.68472	3.89807	3.45269		0.196575	0.166744	0.118832
Volume;d	uL	60.7634	70.3362	52.8338		7.87992	6.35506	5.4775		LVID;s	mm	2.44676	2.8848	2.23222		0.177897	0.194478	0.1087
Stroke Volume	uL	40.1368	37.9693	36.3573		4.68443	1.50216	4.58481		LVPW;d	mm	1.225	1.13426	1.25222		0.113965	0.0931658	0.168605
Ejection Fraction	%	66.8976	55.2058	68.7986		2.58559	2.95852	3.70942		LVPW;s	mm	1.45185	1.26281	1.47907		0.122564	0.112311	0.120765
Fractional Shortening	%	36.6524	28.4387	38.0956		2.05729	1.79775	2.99066		LV Vol;d	uL	59.0757	66.7518	49.5959		7.37023	6.81715	4.03295
Cardiac Output	mL/min	19.7903	18.6075	17.2215		2.44698	1.23849	2.43358		LV Vol;s	uL	22.3088	33.0045	17.0948		3.5228	5.66398	2.20143
IVS;d	mm	1.01759	1.07377	0.970926		0.0368553	0.079596	0.0704337		Ejection Fraction	%	66.8976	55.2058	68.7986		2.58559	2.95852	3.70942
IVS;s	mm	1.48102	1.52747	1.45639		0.0379318	0.102405	0.0828554		Fractional Shortening	%	36.6524	28.4387	38.0956		2.05729	1.79775	2.99066
LVID;d	mm	3.68472	3.89807	3.45269		0.196575	0.166744	0.118832		LV Mass	mg	166.045	176.954	149.609		11.2456	9.99104	15.2111
LVID;s	mm	2.44676	2.8848	2.23222		0.177897	0.194478	0.1087		LV Mass (Corrected)	mg	132.836	141.563	119.688		8.9965	7.99283	12.1689
LVPW;d	mm	1.225	1.13426	1.25222		0.113965	0.0931658	0.168605
LVPW;s	mm	1.45185	1.26281	1.47907		0.122564	0.112311	0.120765
LV Mass	mg	166.045	176.954	149.609		11.2456	9.99104	15.2111
LV Mass (Corrected)	mg	132.836	141.563	119.688		8.9965	7.99283	12.1689				Mean				SEM					Supplementary Table 3
LV Vol;d	uL	59.0757	66.7518	49.5959		7.37023	6.81715	4.03295				Vgll4fl/-;Yapfl/+	Tie2Cre+;Vgll4fl/-	Tie2Cre+;Vgll4fl/-;Yapfl/+		Vgll4fl/-;Yapfl/+	Tie2Cre+;Vgll4fl/-	Tie2Cre+;Vgll4fl/-;Yapfl/+			Echocardiographic parameters
LV Vol;s	uL	22.3088	33.0045	17.0948		3.5228	5.66398	2.20143		Heart Rate	BPM	491.02	487.56	470.8		11.53	17.48	19.79				Vgll4fl/- Yapfl/+	Tie2Cre+ Vgll4fl/-	Tie2Cre+ Vgll4fl/- Yapfl/+
										IVS;d	mm	1.02	1.07	0.97		0.04	0.08	0.07			n	7	6	5
										IVS;s	mm	1.48	1.53	1.46		0.04	0.1	0.08			HR (BPM)	491.02±11.53	487.56±17.48	470.8±19.79
										LVID;d	mm	3.68	3.9	3.45		0.2	0.17	0.12			IVS;d (Depth, mm)	1.02±0.04	1.07±0.08	0.97±0.07
										LVID;s	mm	2.45	2.88	2.23		0.18	0.19	0.11			IVS;s (Depth, mm)	1.48±0.04	1.53±0.1	1.46±0.08
										LVPW;d	mm	1.22	1.13	1.25		0.11	0.09	0.17			LVID;d (Depth, mm)	3.68±0.2	3.9±0.17	3.45±0.12
										LVPW;s	mm	1.45	1.26	1.48		0.12	0.11	0.12			LVID;s (Depth, mm)	2.45±0.18	2.88±0.19	2.23±0.11
										LV Vol;d	uL	59.08	66.75	49.6		7.37	6.82	4.03			LVPW;d (Depth, mm)	1.22±0.11	1.13±0.09	1.25±0.17
										LV Vol;s	uL	22.31	33	17.09		3.52	5.66	2.2			LVPW;s (Depth, mm)	1.45±0.12	1.26±0.11	1.48±0.12
										Ejection Fraction	%	66.9	55.21	68.8		2.59	2.96	3.71			LV Vol;d (ul)	59.08±7.37	66.75±6.82	49.6±4.03
										Fractional Shortening	%	36.65	28.44	38.1		2.06	1.8	2.99			LV Vol;s (ul)	22.31±3.52	33±5.66	17.09±2.2
										LV Mass	mg	166.05	176.95	149.61		11.25	9.99	15.21			%EF	66.9±2.59	55.21±2.96	68.8±3.71
										LV Mass (Corrected)	mg	132.84	141.56	119.69		9	7.99	12.17	±		% FS	36.65±2.06	28.44±1.8	38.1±2.99
																					LV Mass (AW) (mg)	166.05±11.25	176.95±9.99	149.61±15.21
																					LV Mass (AW) Corrected (mg)	132.84±9	141.56±7.99	119.69±12.17
																					Table S3
																					Echocardiographic parameters
																						Vgll4fl/-;Yapfl/+	Tie2Cre+;Vgll4fl/-	Tie2Cre+;Vgll4fl/-;Yapfl/+
																					n	7	6	5
																					HR (BPM)	491.02±11.53	487.56±17.48	470.8±19.79
																					IVS;d (Depth, mm)	1.02±0.04	1.07±0.08	0.97±0.07
																					IVS;s (Depth, mm)	1.48±0.04	1.53±0.1	1.46±0.08
																					LVID;d (Depth, mm)	3.68±0.2	3.9±0.17	3.45±0.12
																					LVID;s (Depth, mm)	2.45±0.18	2.88±0.19A	2.23±0.11
																					LVPW;d (Depth, mm)	1.22±0.11	1.13±0.09	1.25±0.17
																					LVPW;s (Depth, mm)	1.45±0.12	1.26±0.11	1.48±0.12
																					LV Vol;d (ul)	59.08±7.37	66.75±6.82	49.6±4.03
																					LV Vol;s (ul)	22.31±3.52	33±5.66A	17.09±2.2
																					%EF	66.9±2.59	55.21±2.96A	68.8±3.71
																					% FS	36.65±2.06	28.44±1.8A	38.1±2.99
																					LV Mass (AW) (mg)	166.05±11.25	176.95±9.99	149.61±15.21
																					LV Mass (AW) Corrected (mg)	132.84±9	141.56±7.99	119.69±12.17
																					AP < 0.05 versus Vgll4fl/- Yapfl/+ line.
