# Supplementary material for: VGLL4 plays a critical role in heart valve development and homeostasis
Source: PLOS journal article supplement (doi:10.1371/journal.pgen.1007977), 2019-02-21
Supplement: S16 (10.1371/journal.pgen.1007977.s016) [file journal.pgen.1007977.s016.pdf]

**S5 Table**

## Western Blot antibody

| Antibody         | Company  | Catalog | Dilution |
|------------------|----------|---------|----------|
| VGLL4            | ABclonal |         | 1:2000   |
| $\beta$ -Tubulin | DSHB     | E7      | 1:5000   |

## Immunostaining antibody

| Antibody                                          | Company         | Catalog     | Dilution |
|---------------------------------------------------|-----------------|-------------|----------|
| GFP                                               | Abcam           | ab6662      | 1:500    |
| VE-cadherin                                       | R&D             | AF1002      | 1:500    |
| WGA                                               | Invitrogen      | W32464      | 1:500    |
| RFP                                               | Rockland        | 600-401-379 | 1:1000   |
| Troponin I                                        | Abcam           | ab56357     | 1:200    |
| WGA                                               | Invitrogen      | W11261      | 1:500    |
| Periostin                                         | Abcam           | ab14041     | 1:200    |
| Versican                                          | Millipore       | ab1033      | 1:200    |
| Collagen III                                      | Southernbiotech | 1330-01     | 1:500    |
| YAP1                                              | ABclonal        | A1002       | 1:100    |
| Alexa Fluor 555-conjugated donkey anti mouse IgG  | Invitrogen      | A31570      | 1:1000   |
| Alexa Fluor 488-conjugated donkey anti mouse IgG  | Invitrogen      | A21202      | 1:1000   |
| Alexa Fluor 555-conjugated donkey anti goat IgG   | Invitrogen      | A21432      | 1:1000   |
| Alexa Fluor 488-conjugated donkey anti goat IgG   | Invitrogen      | A11055      | 1:1000   |
| Alexa Fluor 647-conjugated donkey anti goat IgG   | Invitrogen      | A21247      | 1:1000   |
| Alexa Fluor 555-conjugated donkey anti rabbit IgG | Invitrogen      | A31572      | 1:1000   |
| Alexa Fluor 488-conjugated donkey anti rabbit IgG | Invitrogen      | A21206      | 1:1000   |
